# Supplementary material for: Genome-Wide Identification and Analysis of the ABCF Gene Family in Triticum aestivum
Source: Int J Mol Sci. 2023 Nov 18;24(22):16478. doi: 10.3390/ijms242216478 (PMC10671407; doi:10.3390/ijms242216478)
Supplement: Supplementary file 1 [file ijms-24-16478-s001.zip › Table S1.xlsx]

## Sheet: Sheet1
Table S1. List of ABCFs CDS and protein sequences from A. thaliana, T. aestivum, Z. mays and O. sativa.
>AT1G60790 cds:protein_coding
ATGGACTCGTCGAAGAAACTCCTGTTTCCAGACCAGATTCTGTCTTCTAGAAGAAACATA
TTAACCAGATTCGGTTTAGGAATCGCTGCTTCTTTCCTTCTCCTTACTCTTCTCTCCCTT
ACTAGTTCCTCCTTCAATGTACCCTTCGTCTCTCCTCTGCTTCAAGGTCTCAAAAGCTCC
AATCTAAACAATTCTTCTTCTGTCAAGCAAGTGAACGAGAAGCCTGAAGTAGTGAATCTC
ACCGACAAGGTCCCAGATGTCAAAGTTCCAAGCTTTGTGGTCCCAGACGCTGGTTCGAAG
AACACAACTTTGTCTGAAGAAAGTAAAGTTCCAAGCTTTGATTCTGGACAAAGATCTGGA
GAAACAGTTAAGAACTCGAGTCTGGCTGAAGAGGGTAATGGTTCAGTTGCAGATGACCAA
AATACCCTTGAAGCAAATGCGACAACAAGTGTGGGAAACAGCTCGAGCTTGGTGTCTGAT
TTGGGAGGAAGATTTGTTGTACCTGCAAACACAAGCAAAGAGAATGGCTCTGTGACTGAA
GATCGAAGCAGAGGTTCGTATGAGGATTGTGATATCTACGATGGAAGTTGGGTTAGAGCT
GATGATGAGACAATGCCGTATTACCCACCTGGTTCTTGTCCGTATATAGACAGAGATTTC
AACTGTCACGCTAATGGAAGACCTGATGATGCTTATGTTAAATGGAGATGGCAACCAAAT
GGGTGTGACATTCCCAGGTTGAATGGAACTGATTTTCTGGAGAAGCTAAGAGGGAAGAAG
CTGGTTTTCGTGGGAGATTCGATAAACCGGAACATGTGGGAGTCTCTTATTTGCATCCTT
AGACATAGTCTCAAGGACAAGAAACGAGTGTATGAGATCTCTGGGAGAAGAGAGTTCAAG
AAGAAAGGGTTTTATGCTTTCAGATTCGAGGACTATAATTGCACGGTGGATTTCGTTGGC
TCGCCCTTTTTTGTAAGGGAATCAAGTTTCAAAGGTGTGAATGGGACTACATTGGAGACT
TTAAGGTTGGATATGATGGATAAGACGACATCCATGTATCGAGATGCTGATATACTGATT
TTCAACACTGGCCATTGGTGGACTCATGACAAAACAAAGCTAGGAGAAAACTATTACCAA
GAAGGTAACGTTGTGTACCCGAGGCTCAAGGTTCTCGAAGCTTATAAACGAGCTCTCATT
ACTTGGGCGAAATGGGTCGATAAGAACATCGACCGCAGTCAAACCCACATAGTATTTAGA
GGATATTCCGTTACACACTTCAGAGGAGGGCCATGGAACTCAGGTGGACAATGCCACAAA
GAAACAGAACCGATTTTCAACACGAGTTACTTAGCAAAGTATCCATCGAAGATGAAAGCT
CTCGAGTATATTCTCCGTGATACAATGAAAACTCCGGTGATATATATGAACATAAGTCGA
CTAACAGATTTCAGAAAAGATGGTCATCCTTCGATATACAGAATGGTTTACAGGACGGAA
AAAGAGAAAAGAGAGGCCGTGAGTCACCAAGATTGTAGCCATTGGTGCTTGCCGGGTGTA
CCGGACACATGGAACCAGCTCTTGTACGTATCACTGTTAAAGGCCGGGCTAGCGTCTAAG
TGGTAG
>AT1G60790 pep:protein_coding
MDSSKKLLFPDQILSSRRNILTRFGLGIAASFLLLTLLSLTSSSFNVPFVSPLLQGLKSS
NLNNSSSVKQVNEKPEVVNLTDKVPDVKVPSFVVPDAGSKNTTLSEESKVPSFDSGQRSG
ETVKNSSLAEEGNGSVADDQNTLEANATTSVGNSSSLVSDLGGRFVVPANTSKENGSVTE
DRSRGSYEDCDIYDGSWVRADDETMPYYPPGSCPYIDRDFNCHANGRPDDAYVKWRWQPN
GCDIPRLNGTDFLEKLRGKKLVFVGDSINRNMWESLICILRHSLKDKKRVYEISGRREFK
KKGFYAFRFEDYNCTVDFVGSPFFVRESSFKGVNGTTLETLRLDMMDKTTSMYRDADILI
FNTGHWWTHDKTKLGENYYQEGNVVYPRLKVLEAYKRALITWAKWVDKNIDRSQTHIVFR
GYSVTHFRGGPWNSGGQCHKETEPIFNTSYLAKYPSKMKALEYILRDTMKTPVIYMNISR
LTDFRKDGHPSIYRMVYRTEKEKREAVSHQDCSHWCLPGVPDTWNQLLYVSLLKAGLASK
W
>AT5G09930 cds:protein_coding
ATGGTATTAACGACGAATCTCTATAGCTTAAACCTTCGTTCGACCTTCTTCTTCACTAAT
ACTATTACTTGCCCTACACTTTTCACCTTCAAACTCTCCTCTGTTTCTAACCCTAGACGA
GTATTCCCCAATATTAGAGCTCACGTTTCCGCAGCCAGCTCCAATTCAGAGCTCGAATCT
CTCTTATCTACCGATCGGAAGCTGATCAGTAAGCAATCAAACAATGGTGCGTCTTCGATT
TCGTCGGGAGTGAGACTTGAGAACATTAGTAAGAGCTATGAAGGCATTACGGTGCTAAAG
GATGTGACTTGGGAAGTGAAGAAAGGAGAAAAAGTAGGGTTAATCGGCGTCAACGGTGCA
GGGAAGACGACACAGCTCAGGATCATAACGGGTCAAGAAGAACCTGATTCAGGAAACGTG
ATTTGGGCCAAACCCAATTTGAAAGTTGCTTTCTTGAGTCAAGAGTTCGAGGTTTCAATG
GGGAAGACAGTGAAGGAAGAGTTCATGTGTACGTTTAAGGAAGAGATGGAAATAGCGAGG
AAGCTTGAGAACTTGCAGAAGGCGATTGAAGAAGCTGTTGATGATTTAGAACTAATGGGA
AAGTTACTAGACGAATTCGATTTGTTGCAGAGACGAGCTCAAGAGGTTGATTTGGATTCT
ATCCATGCTAAAATCAGTAAGCTGATGTCGGAATTAGGGTTTGTGTCGGAGGATGCTGAT
AGGCTTGTGGCTTCTTTTAGCAGTGGATGGCAAATGAGAATGTCACTTGGGAAGATTTTG
CTTCAGAATCCAGATTTACTGCTTTTGGATGAGCCAACGAATCATTTGGATCTTGATACT
ATTGAGTGGCTTGAAGGTTACTTGATTAAGCAAGATGTGCCTATGGTCATAATATCACAT
GACAGGGCGTTTCTTGATCAGTTGTGTACTAAAATTGTGGAAACCGAAATGGGAGTTTCG
AGGACTTTCGATGGTAATTACTCTCAGTATGTAATTTCAAAGGCAGAGTTGGTTGAAGCT
CAGTATGCTGCTTGGGAGAAGCAACAGAAAGAGATTGAAGCAACAAAGGATTTGATTAGT
AGGCTAAGTGCTGGAGCAAATTCTGGTCGAGCTTCTTCAGCAGAAAAGAAACTGGAGAAG
CTTCAGGAAGAGGAGCTAATAGAGAAGCCATTTCAGCGGAAACAAATGAAAATCCGGTTT
CCGGAATGTGGATTAAGTGGAAGATCTGTAGTCACTGTTAAGAATCTTGTATTTGGTTTT
GATGATAAGATGTTATTTAACAAGGCGAATCTAGCTATAGAAAGAGGAGAGAAAGTCGCT
ATAATTGGTCCAAACGGGTGCGGAAAGAGTACATTGCTGAAACTTATTATGGGTTTGGAG
AAGCCTATGAGAGGTGAGGTGATACTTGGGGAGCACAATGTATTGCCAAACTACTTCGAG
CAGAATCAGGCAGAGGCTCAAGATTTGGATAAAACGGTGATTGAGACAGTTGTTGAAGCT
GCTGTAGATTGGAGAATTGATGATATAAAAGCTCTTCTTGGTCGGTGCAACTTCAAAGCT
GACATGTTGGATAGAAAGGTCTCTCTTTTGAGTGGTGGTGAGAAGGCACGCCTTGCTTTC
TGCAAATTCATGGTGAAACCATCCACTCTACTTGTGTTGGACGAACCCACCAATCACTTA
GACATACCTTCAAAAGAAATGCTTGAGGAAGCTATAAATGAGTACAAAGGCACGGTCATC
ACAGTCTCACACGATAGATACTTCATTAAACAGATTGTTAACAGAGTTATTGAAGTCAGA
GATGGTGGTTTAATGGACTATGCAGGAGACTACAATTATTTCCTGGAGAAGAATGTTGAA
GCTAGAGCAAGGGAGCTGGAGAGGGAAGCAGAATTGGAAGAAAAAGCTCCAAAAGTGAAA
GCAAAGTCAAAGATGTCAAAGGCTGAGAGAGAAGCACGGAAGAAGCAAAAGATGAAAGCG
TTTCAAGCTTCCAAAAAGAAGTCAAAGTCCAGCAAAAATGCCAAGAGATGGAATTAA
>AT5G09930 pep:protein_coding
MVLTTNLYSLNLRSTFFFTNTITCPTLFTFKLSSVSNPRRVFPNIRAHVSAASSNSELES
LLSTDRKLISKQSNNGASSISSGVRLENISKSYEGITVLKDVTWEVKKGEKVGLIGVNGA
GKTTQLRIITGQEEPDSGNVIWAKPNLKVAFLSQEFEVSMGKTVKEEFMCTFKEEMEIAR
KLENLQKAIEEAVDDLELMGKLLDEFDLLQRRAQEVDLDSIHAKISKLMSELGFVSEDAD
RLVASFSSGWQMRMSLGKILLQNPDLLLLDEPTNHLDLDTIEWLEGYLIKQDVPMVIISH
DRAFLDQLCTKIVETEMGVSRTFDGNYSQYVISKAELVEAQYAAWEKQQKEIEATKDLIS
RLSAGANSGRASSAEKKLEKLQEEELIEKPFQRKQMKIRFPECGLSGRSVVTVKNLVFGF
DDKMLFNKANLAIERGEKVAIIGPNGCGKSTLLKLIMGLEKPMRGEVILGEHNVLPNYFE
QNQAEAQDLDKTVIETVVEAAVDWRIDDIKALLGRCNFKADMLDRKVSLLSGGEKARLAF
CKFMVKPSTLLVLDEPTNHLDIPSKEMLEEAINEYKGTVITVSHDRYFIKQIVNRVIEVR
DGGLMDYAGDYNYFLEKNVEARARELEREAELEEKAPKVKAKSKMSKAEREARKKQKMKA
FQASKKKSKSSKNAKRWN
>AT1G64550 cds:protein_coding
ATGACTGAAGTTGCGAGCTCAGTGGTGTATGAAGTGCTCGGACGCAGAGCTCAGGATGTG
GACGAGCCGATTATGGACTACATCATTAATGTCCTCGCTGATGAGGATTTCGACTTCGGT
GAGGAAGGTGAAGGCGCCTTTGATGCCGTCGGTGAGCTCCTCGTCGCTGCTGAATGCGTT
TCCGATTTCGAAGAGTGCCGTTTGGTTTGTAGCAAACTGTCGGATAAGTTTGGAAAGCAT
GGATTGGTGAAGCCTACACCTACTGTGAGGAGTCTTGCTATGCCTGTGCGGATGAACGAT
GGGATGGATGATGGACCTGTTAAGAAGAAGAAGCCAGAGCCTGTGGATGGGCCTTTGCTC
ACTGAACGTGACTTGGCTAAGATTGAAAGGAGAAAGAAAAAGGATGATCGCCAAAGAGAG
CTACAATATCAGCAGCATGTTGCTGAAATGGAAGCCGCTAAAGCAGGGATGCCTACTGTT
AGTGTCAATCATGACACTGGTGGTGGCTCTGCTATCAGAGATATTCATATGGATAACTTT
AATGTTTCTGTTGGAGGCCGTGATCTCATTGTCGATGGATCAATCACCCTCTCTTTTGGA
CGTCATTACGGTCTTGTAGGACGTAATGGTACCGGAAAAACAACTTTTTTGAGGTATATG
GCTATGCATGCTATAGAGGGTATTCCTACTAATTGCCAGATATTGCATGTTGAACAAGAA
GTCGTTGGTGACAAGACAACAGCCTTACAGTGCGTTCTTAACACTGATATTGAAAGAACC
AAACTGTTGGAAGAAGAGATTCAAATACTAGCAAAGCAGAGAGAAACGGAAGAACCCACA
GCTAAGGATGGAATGCCTACCAAAGACACAGTTGAAGGAGATCTTATGTCTCAAAGGCTT
GAAGAAATATACAAAAGGCTTGATGCAATTGATGCTTATACTGCTGAGGCTCGGGCAGCT
AGTATCCTTGCTGGTCTAAGTTTCACTCCAGAAATGCAGCTGAAAGCTACAAATACTTTT
TCAGGAGGATGGAGAATGCGAATTGCACTTGCTCGTGCACTATTTATAGAGCCTGATTTG
TTGTTGCTTGATGAACCTACGAACCATCTTGATCTCCATGCTGTCTTATGGTTAGAAACA
TATCTAACGAAGTGGCCAAAAACATTTATAGTCGTTTCCCATGCTAGGGAATTCTTGAAC
ACGGTGGTCACGGACATCATCCATTTGCAAAACCAAAAACTAAGTACCTATAAAGGAAAT
TATGATATCTTCGAAAGAACACGGGAAGAACAAGTGAAAAATCAGCAAAAAGCTTTTGAA
TCAAGTGAACGATCACGGTCACATATGCAGGCGTTCATTGATAAATTTCGTTACAATGCA
AAGAGGGCGTCTCTTGTTCAGTCAAGAATCAAGGCATTGGACCGACTGGCTCATGTGGAT
CAAGTTATTAATGATCCTGACTATAAATTTGAATTCCCAACTCCTGACGATAAGCCTGGA
CCTCCCATCATCAGTTTTAGTGATGCATCATTTGGCTACCCTGGTGGTCCGTTGTTGTTT
AGGAACCTAAATTTCGGAATAGATCTGGACAGCCGTATTGCAATGGTGGGACCCAATGGT
ATTGGTAAATCAACAATACTCAAACTTATTTCTGGCGATCTGCAACCAAGCTCTGGAACA
GTTTTCCGTTCTGCTAAGGTTCGAGTTGCAGTCTTTAGTCAGCACCATGTGGATGGACTA
GACCTTTCATCGAATCCTCTTCTATATATGATGAGATGCTACCCAGGAGTACCAGAACAA
AAGCTGAGAAGTCACTTGGGTTCTCTTGGGGTAACTGGAAATCTTGCACTGCAGCCCATG
TACACTTTATCAGGTGGTCAGAAAAGCAGAGTTGCATTTGCGAAGATAACATTCAAGAAA
CCACACTTGCTATTGCTTGATGAGCCGTCCAATCATCTTGATTTGGATGCCGTGGAAGCT
TTGATTCAAGGACTTGTCTTATTCCAAGGCGGTATTTGCATGGTGAGTCACGACGAGCAT
CTGATATCGGGAAGCGTGGACGAGTTGTGGGTTGTGTCAGACGGCAGGATTGCACCATTC
CATGGAACCTTCCATGACTACAAGAAGCTTCTCCAGTCTTCAACTTAA
>AT1G64550 pep:protein_coding
MTEVASSVVYEVLGRRAQDVDEPIMDYIINVLADEDFDFGEEGEGAFDAVGELLVAAECV
SDFEECRLVCSKLSDKFGKHGLVKPTPTVRSLAMPVRMNDGMDDGPVKKKKPEPVDGPLL
TERDLAKIERRKKKDDRQRELQYQQHVAEMEAAKAGMPTVSVNHDTGGGSAIRDIHMDNF
NVSVGGRDLIVDGSITLSFGRHYGLVGRNGTGKTTFLRYMAMHAIEGIPTNCQILHVEQE
VVGDKTTALQCVLNTDIERTKLLEEEIQILAKQRETEEPTAKDGMPTKDTVEGDLMSQRL
EEIYKRLDAIDAYTAEARAASILAGLSFTPEMQLKATNTFSGGWRMRIALARALFIEPDL
LLLDEPTNHLDLHAVLWLETYLTKWPKTFIVVSHAREFLNTVVTDIIHLQNQKLSTYKGN
YDIFERTREEQVKNQQKAFESSERSRSHMQAFIDKFRYNAKRASLVQSRIKALDRLAHVD
QVINDPDYKFEFPTPDDKPGPPIISFSDASFGYPGGPLLFRNLNFGIDLDSRIAMVGPNG
IGKSTILKLISGDLQPSSGTVFRSAKVRVAVFSQHHVDGLDLSSNPLLYMMRCYPGVPEQ
KLRSHLGSLGVTGNLALQPMYTLSGGQKSRVAFAKITFKKPHLLLLDEPSNHLDLDAVEA
LIQGLVLFQGGICMVSHDEHLISGSVDELWVVSDGRIAPFHGTFHDYKKLLQSST
>AT3G54540 cds:protein_coding
ATGGGTAAGAAGAAGTCAGACGAGAGTGCTGCTACCACAAAGGTGAAGCCAAGTGGGAAA
GATGCTTCGAAAGATTCTAAAAAAGAGAAATTGTCAGTCTCGGCTATGCTTGCAGGCATG
GATCAGAAAGATGATAAACCGAAGAAGGGCTCATCATCTAGAACCAAGGCTGCTCCGAAA
TCTACATCTTACACTGATGGCATAGATCTTCCTCCTTCTGATGAAGAAGACGACGGTGAA
TCTGATGAGGAAGAGAGACAGAAGGAAGCAAGGAGGAAGCTGAAGAGTGAACAAAGGCAC
CTTGAGATATCTGTGACTGATAAGGAACAAAAGAAGCGAGAGGCGAAAGAAAGATTAGCT
CTTCAGGCTGCAGAGTCGGCAAAGAGGGAGGCTATGAAGGACGATCATGATGCATTCACG
GTTGTTATTGGAAGCAAGACCTCAGTGCTTGAAGGAGACGACATGGCTGATGCAAATGTT
AAGGATATTACCATAGAATCTTTTTCTGTATCTGCTCGAGGTAAAGAGCTTTTGAAGAAT
GCTTCTGTCAGGATTTCACATGGTAAAAGGTATGGGTTGATCGGGCCAAACGGAATGGGA
AAGTCTACACTGTTAAAGCTTTTAGCTTGGAGGAAGATTCCAGTGCCAAAGAATATTGAT
GTTCTTCTTGTTGAGCAAGAGGTGGTTGGTGATGAAAAGAGTGCTCTGAATGCAGTTGTC
TCTGCCAATGAAGAGTTGGTTAAGCTACGGGAAGAGGCTGAAGCTCTGCAGAAGTCGTCT
TCTGGAGCTGATGGAGAAAATGTTGATGGTGAGGATGATGATGATACTGGAGAAAAGCTT
GCTGAACTGTATGACAGGCTGCAGATTTTAGGGTCAGATGCTGCTGAAGCACAGGCATCC
AAAATTCTTGCGGGGTTAGGTTTCACAAAAGATATGCAAGTGCGTGCGACTCAGTCCTTC
AGTGGTGGCTGGAGGATGCGAATATCATTAGCTAGAGCTCTGTTCGTGCAACCTACCCTT
TTGCTGTTAGATGAACCCACTAACCATCTTGACCTGAGAGCTGTTCTATGGTTAGAGGAG
TATTTGTGTCGCTGGAAGAAGACACTAGTTGTTGTTTCACATGACCGGGACTTCCTCAAC
ACAGTCTGCACGGAGATAATACATCTCCATGACCAAAATCTCCACTTCTACCGTGGTAAT
TTCGATGGTTTTGAAAGCGGATATGAGCAGCGTCGCAAGGAGATGAACAAAAAATTTGAT
GTCTACGACAAACAGATGAAAGCAGCGAAGAGGACTGGAAACCGGGGTCAACAGGAGAAG
GTAAAGGACAGGGCCAAGTTTACTGCTGCAAAAGAAGCATCCAAGAGTAAGTCAAAGGGC
AAGACAGTGGATGAAGAAGGCCCAGCACCAGAAGCTCCAAGGAAGTGGAGAGATTACAGT
GTGGTGTTCCACTTCCCAGAACCAACTGAGCTCACTCCTCCTCTTCTGCAGTTAATTGAG
GTTAGCTTCAGCTATCCCAACAGGCCAGATTTCAGACTCTCGAATGTTGATGTAGGTATC
GATATGGGGACACGGGTTGCGATAGTTGGGCCTAACGGAGCAGGAAAGTCCACTCTATTA
AATCTTCTTGCGGGAGATTTAGTTCCAACAGAGGGTGAAATGAGAAGAAGCCAGAAGCTG
AGGATTGGCAGGTATTCTCAGCATTTTGTTGACCTTTTAACAATGGGGGAAACACCGGTT
CAGTATCTCCTTCGTCTTCATCCTGACCAAGAGGGATTTAGCAAGCAAGAGGCAGTGCGA
GCGAAGCTAGGCAAGTTTGGGCTACCAAGTCACAATCACTTATCTCCAATTGCGAAATTG
TCTGGAGGACAAAAGGCTAGGGTTGTGTTCACCTCGATCTCAATGTCAAAACCACACATT
TTGCTTCTGGACGAGCCTACAAATCACTTAGACATGCAGAGTATAGATGCCTTGGCGGAT
GCACTAGATGAGTTCACAGGTGGAGTTGTGTTGGTGAGTCACGACTCGAGACTCATATCA
CGTGTATGTGCGGAAGAGGAGAAGAGTCAAATTTGGGTTGTAGAAGACGGAACAGTGAAT
TTCTTCCCAGGCACATTTGAAGAGTACAAAGAAGATCTCCAAAGAGAAATCAAAGCAGAA
GTTGATGAGTGA
>AT3G54540 pep:protein_coding
MGKKKSDESAATTKVKPSGKDASKDSKKEKLSVSAMLAGMDQKDDKPKKGSSSRTKAAPK
STSYTDGIDLPPSDEEDDGESDEEERQKEARRKLKSEQRHLEISVTDKEQKKREAKERLA
LQAAESAKREAMKDDHDAFTVVIGSKTSVLEGDDMADANVKDITIESFSVSARGKELLKN
ASVRISHGKRYGLIGPNGMGKSTLLKLLAWRKIPVPKNIDVLLVEQEVVGDEKSALNAVV
SANEELVKLREEAEALQKSSSGADGENVDGEDDDDTGEKLAELYDRLQILGSDAAEAQAS
KILAGLGFTKDMQVRATQSFSGGWRMRISLARALFVQPTLLLLDEPTNHLDLRAVLWLEE
YLCRWKKTLVVVSHDRDFLNTVCTEIIHLHDQNLHFYRGNFDGFESGYEQRRKEMNKKFD
VYDKQMKAAKRTGNRGQQEKVKDRAKFTAAKEASKSKSKGKTVDEEGPAPEAPRKWRDYS
VVFHFPEPTELTPPLLQLIEVSFSYPNRPDFRLSNVDVGIDMGTRVAIVGPNGAGKSTLL
NLLAGDLVPTEGEMRRSQKLRIGRYSQHFVDLLTMGETPVQYLLRLHPDQEGFSKQEAVR
AKLGKFGLPSHNHLSPIAKLSGGQKARVVFTSISMSKPHILLLDEPTNHLDMQSIDALAD
ALDEFTGGVVLVSHDSRLISRVCAEEEKSQIWVVEDGTVNFFPGTFEEYKEDLQREIKAE
VDE
>AT5G64840 cds:protein_coding
ATGGGTTTATCAACGAATCTCCATAGCCTCGACCTCCGTTCAACTTTCTTCACCGGTCTA
CGTACATCTCCAATCCCTTCCAATTTCATCAAAATCTCTTCCATTTCCAACCCTAGACGC
GATATCTCCACCATCAGAGCCCAAGTCTCCACCATCAGCCTCGAGACCTCCGTTAAACAG
CGTCAAGACGAAATCGAATCTCTTTTCTCGAAGCAACCCTCTCAGCAAGACTCCGATCGG
AAACGAAACGGGAAGAGTTCCAAAAACGGAGCTTCTGGGATATCTTCAGGTGTGAAGCTA
GAGAACATAAGGAAAAGCTACAAAGGCGTGACTGTGCTTAAAGATGTGACATGGGAAGTG
AAGAGAGGTGAGAAAGTAGGGTTAGTTGGTGTGAACGGAGCTGGGAAGACGACTCAGCTC
AGGATTATCACTGGTCAAGAAGAGCCTGATTCTGGTAACGTAATCAAGGCCAAACCCAAT
ATGAAAGTAGCTTTCTTGAGCCAGGAATTTGAGGTTTCGATGAGTAAGACTGTGAGGGAA
GAGTTCATGACTGCTTTCAAGGAAGAGATGGAGATTACTGAGAAGCTTGAGAAAGTTCAG
AAGGCTATTGAGGGATCTGTTGATGATTTGGATCTTATGGGAAGGTTATTAGATGAATTT
GATTTGTTGCAGAGACGAGCTCAGGCTGTGAATTTAGATTCCGTTGATGCTAAGATTAGT
AAGTTGATGCCGGAATTAGGGTTTGCTCCTGAGGATGCTGATAGGCTTGTGGCTTCGTTT
AGTGGTGGATGGCAAATGAGAATGTCACTTGGAAAGATTTTGCTTCAGGATCCAGATTTG
CTGCTACTTGATGAGCCGACAAATCATTTGGATCTTGATACTATTGAGTGGCTTGAAGGT
TATTTGCAAAAGCAAGATGTGCCTATGGTTATTATTTCACATGACAGAGCCTTTCTTGAT
CAGTTATGTACTAAAATTGTGGAAACTGAGATGGGTGTGTCCAGGACATTTGAGGGTAAT
TATTCTCAGTATGTGATCTCAAAGGCTGAGTGGATCGAAACTCAGAATGCAGCGTGGGAA
AAGCAACAGAAAGATATCGACTCAACTAAGGACTTGATCGCCAGGCTTGGTGCTGGTGCC
AATTCTGGTCGTGCTTCCACTGCAGAAAAGAAACTAGAGAAGCTTCAAGAACAGGAGCTA
ATAGAGAAGCCATTTCAGCGGAAGCAGATGAAGATTAGGTTTCCAGAGCGTGGGACAAGT
GGAAGATCGGTAGTCAATGTTAAAAACATTGATTTTGGTTTCGAGGATAAGATGCTATTT
AAGAAGGCTAATCTATCAATAGAAAGAGGGGAGAAAATCGCCATCCTTGGGCCAAACGGT
TGTGGGAAAAGTACGTTATTGAAGCTAATTATGGGTTTAGAGAAGCCTGTGAAAGGTGAA
GTTATTCTTGGAGAGCACAATGTACTGCCAAACTACTTTGAACAGAATCAGGCTGAGGTC
CTTGATTTGGATAAAACAGTGCTTGAAACTGTTTGTGAAGCTGCAGAAGACTGGAGAAGT
GATGATATAAAAGGTCTTCTTGGACGCTGCAACTTCAAAGCAGACATGCTTGATCGAAAG
GTCTCTCTTTTAAGTGGTGGGGAGAAAGCGCGTCTTGCTTTCTGCAAATTCATGGTGACG
CCATCTACTTTACTCGTTTTGGACGAACCAACCAATCACTTAGACATTCCTTCAAAAGAA
ATGCTCGAGGAAGCGATAAACGAGTACCAAGGTACAGTCATTGCGGTATCCCACGATCGA
TACTTCATCAAACAAATCGTTAACAGAGTGATAGAAGTAGAAGATGGTTGTTTAGAAGAT
TATGCAGGCGACTACAATTATTACTTGGAGAAGAATCTGGATGCTAGAACAAAGGAGCTA
GAGAGAGAAGCAGAGCTAGAAGAGAAAGCACCAAAAGTGAAGGCAAAGTCAAAGATGTCA
AAAGCAGAGAAAGAAGCGAGGAAGAAGCAGAAGATGCAAGCATTTCAACAAGCTAAACAG
AAGTCAAAGGCTAGCAAGAACTCCAAGAGATGGAACTGA
>AT5G64840 pep:protein_coding
MGLSTNLHSLDLRSTFFTGLRTSPIPSNFIKISSISNPRRDISTIRAQVSTISLETSVKQ
RQDEIESLFSKQPSQQDSDRKRNGKSSKNGASGISSGVKLENIRKSYKGVTVLKDVTWEV
KRGEKVGLVGVNGAGKTTQLRIITGQEEPDSGNVIKAKPNMKVAFLSQEFEVSMSKTVRE
EFMTAFKEEMEITEKLEKVQKAIEGSVDDLDLMGRLLDEFDLLQRRAQAVNLDSVDAKIS
KLMPELGFAPEDADRLVASFSGGWQMRMSLGKILLQDPDLLLLDEPTNHLDLDTIEWLEG
YLQKQDVPMVIISHDRAFLDQLCTKIVETEMGVSRTFEGNYSQYVISKAEWIETQNAAWE
KQQKDIDSTKDLIARLGAGANSGRASTAEKKLEKLQEQELIEKPFQRKQMKIRFPERGTS
GRSVVNVKNIDFGFEDKMLFKKANLSIERGEKIAILGPNGCGKSTLLKLIMGLEKPVKGE
VILGEHNVLPNYFEQNQAEVLDLDKTVLETVCEAAEDWRSDDIKGLLGRCNFKADMLDRK
VSLLSGGEKARLAFCKFMVTPSTLLVLDEPTNHLDIPSKEMLEEAINEYQGTVIAVSHDR
YFIKQIVNRVIEVEDGCLEDYAGDYNYYLEKNLDARTKELEREAELEEKAPKVKAKSKMS
KAEKEARKKQKMQAFQQAKQKSKASKNSKRWN
>TraesCS2D02G360400.1
MAGWRKAWLSVLDRGGGGGGGGGSSGSLQAHLNGLLSPSSSSSSLATAHKRGSFPGGKHG
GGTFVSTKAALACFSVVLVIAFFYVSITGRPAAEDSFPTPTGSSPASGALLSSNSSTPTS
PRKPLPPRPPVSPHVSSTGTAQRSSARNATVVSPRRVQSNNSDDDWAPTDGSGQPALVPE
DIGKAQDPLYNAGNATISESDGEPVVGNGTKAQDVTAMPTPPWRRADAANSTGKPIISAP
DEPSDSEGATGNSTDTVVRSSKEDRNANASVDNVLPTSTRRAALPSTPPGQRKEDRRRRK
RASMSRHKQRSIRRRKEFVHPVQEGAAADHSDGAGIGTAGANTSSGNHSDVIGIVGAGNH
QVVWTSSADHSDGAGTGTVTAGANTSVAVGPVNHRVEWTPSAEHSDAAGTGTVTAAANTS
LAVGPGNHRVVWTSGVQDLVTFAKCDLFSGRWVREENHAFYPPRSCPHIDGDFNCHKNGR
QDTGFLNWRWQPSGCNIPRMNVTDFLERLRGQRIIFVGDSLNRNMWESLVCILRHGVRNK
KNVYEKSGKNQFKTRGFYSFKFRDYNCSVDFIRSTFLVKETVRESPNGTVLDEKLRLDEL
DATTPAYQTADIVVVNTGHWWTHPKTSKGLNYYQEGYRVHHSLEVMEAYRKALTTWAKWV
DKNIDPTRTQIVFRGLSLTHFKGGQWNSGGRCHRETEPIFSQTYLTEYPERMRILEKVMS
RMKTPVIYLNISRLTDYRKDGHPSVYRVRYDTEEERMAAVATKQDCSHWCLPGVPDTWNE
LLYASLLQAGKGPWRL
>TraesCS2B02G381000.1
MAGWRKAWLSVLDRSGGGGGGGASSGSLQAHLNGLLSPSSSSTSLATAHKRGSGAGGKHG
GGPYVSTKAVLACFSAVLVIAFFYISVTGRPSPDDSFPTPTGSSPASGALLSSNSSTPTS
PRKPLPTHPPVLPNVSSTGTAQRSSARNATVVSPSRVQSNNSDDDWAPADGSGQPALVPE
DMGKAQGPLYNAENATISGSDGEPVVGNGTKAQDVTAMPTPAWRRADAANSTGKPIIGGS
PDEPADSEGATGNSTDTVVRSSKEDRNANASVDNVPPNSTRRAALPSTAPGQRKEDRRRR
KRASMARHKQRSIRRRKEFVHPVQEGAAADNSDGIATAGANTSVAIGPGNHQVVWTSSAD
HSDGAGTGTVTAGANTSVAVGPGNHRVEWTPSADHSDGVGTGTVTAAANTSVSVGPGNHR
VVWTSGVQDLVTFAKCDLFSGRWVREENHAFYPPRSCPHIDGDFNCHKNGRQDTGFLNWR
WQPTGCNIPRMNASDFLERLRGQRIIFVGDSLNRNMWESLVCTLRHGVRNKKNVYEKSGK
NQFKTRGFYSFKFRDYNCSVDFIRSTFLVKETVRESPNGTVLDEKLRLDELDATTPAYQT
ADIVVVNTGHWWTHPKSSKGLNYYQEGNRVHHSLEVMDAYMKALTTWAKWVDKNIDPTRT
QIVFRGLSLTHFRGGQWNSGGRCHRETEPIFNQTYLTEYPKRMRMLEKVMSRMKTPVIYL
NISRLTDYRKDGHPSVYRVRYETEEERMAAAATKQDCSHWCLPGVPDTWNELLYASLLQA
GKGPWRL
>TraesCS2A02G363100.1
MAGWRKAWLSVLDRGGGGGGGSSGSLQAHLNGLLSPSSSSSSLVTAHKRGSGLGGRHGGG
PYVSTKAALACFSVVLVIAFFYVSITGRPAAEDSFPTPTGSSAASGALLSSNSSTPTSPR
KSPPPHPPISPNVSSTGNATVVAPRRVQSNNSDDYWAPADGSGQPALVPEEDMGKAQGPL
YDAGNATISGSDEEPVVGNGTKAQDVTAMPTPPWRRADAANSTGNPIIGAPDEPSDSDGA
TGNSTDTAVPSSKEDRNANASVDNVPPNSTRRAALPSRTPDQRKEDRRRRKRASMARHKQ
RSTRRRKEFVHPMQEVAAADNSDGTGTGTGTAGANTRVASGSGNQRVVWTSAADHSDGAG
TGTVTAGANTSVAVGPVNHRVEWTPSADHSDDTGTGTVTAGANTSVAVGPGNHRVVWTSG
VQDLVTFAKCDLFSGRWVREENHAFYPPRSCPHIDGDFNCHKNGRQDTGFLNWRWQPTGC
NIPRMNVTDFLERLRGQRIIFVGDSLNRNMWESLVCTLRHGVRNKKNVYEKSGKNQFKTR
GFYSFKFRDYNCSVDFIRSTFLVKETVRESPNGTVLDEKLRLDELDATTPAYQTADIVVV
NTGHWWTHPKTSKGLNYYQEGYRVHHSLEVMEAYRKALTTWAKWVDKNIDPTRTQIVFRG
LSLTHFKGGQWNSGGRCHRETEPIFNHTYLTEYPERMRVLEKVMSRMKTPVIYLNISRLT
DYRKDGHPSVYRVRYDTEEERMAAAATKQDCSHWCLPGVPDTWNELLYASLLQAGKGSWR
L
>TraesCS7B02G072300.1
MKGLWKQSGLAAMACANTDQLGPSGAGAGRSRRRARLVVYALAVAFAALTAYIALCSPAA
PAGAGVGGGGDGASWFDGVYASTAPYRSQVSTFFSSIFPTNSSAPSPEPPRRDGGGSAGG
SSEGGGEVNRDVDGKRVGSGAGSSNSATAGSEKQLGSGGSAPSSNAAGGSAPSAVNPAGG
GTAAAKSDSPTNNPATSGSAPVSSADRNKGNSTGGGSSSQAGGGGGSPTSDSAGERTVAK
ADEESDGSNKQSGSVAPTNNGAAGNVSAVKADTKDSVVVSAGDGSTAKSDSKIGSDSQAV
TAGGAPSSGSAAGNSTTAKAGGKDSVGAASSGSAATDTVVKADPNNESDGASGSGNVDET
NKSAPSATPVKSNAEDGGIQRDKASGNVASTSNQTAVAGEKEDGSSTKNQTLVTSPIATK
QNQTSVPSSVGSGSAVNKKETTPQVSAGSLKDHSSQTIAAKAGNHSEVLVKGNVSSTKQA
GGASGNKKVDWIKEMAGCDMFHGNWVRDDSYPLYPGGSCPHIDEPFDCHLNGRPDRAYEK
LRWQPSGCNIPRLNPTDMLERLRGKRLVFVGDSLNRNMWESLVCILRHSVKDKRKVFEAS
GRREFKTEGSYSFLFTDYNCSVEFFRSPFLVQEWETRVSNGNKKETLRLDIVEQSSPKYK
DADFIIFNTGHWWTHEKTALGKDYYQEGSHIYSELNVVDAFHKALITWSRWIDGNVNPKK
TTVMFRGYSASHFSGGQWNSGGSCDKETEPIKNEQYLSTYPPKMSILEDVIHKMRTPVVY
LNITRLTDYRKDAHPSIYRKQHLSEEERRSPERYQDCSHWCLPGVPDSWNELVYAQLLIS
QHQMLQQ
>TraesCS7D02G168300.1
MKGLWKQSGLAAMASADAGQLDPAGAGAGRSRRRARLVVYALAVAFAALTAYIALCSPAA
PAGAGVGGGRDGASWFDGVYASTAPYRSQVSTFFSSVFPTNSSAPSPEPSRRDGGGAASG
SSEGGGEVNRDVDSKQVGSGAGSSSSATAGSDKQLGSGGSAPSSNAAGAGAPPAGSPAGS
GTAAAKSDSPTNNSATSGGAPISSADRNKGNSTGGDSSSQAGGGGESPTSDSAGERTVAK
ADEESDGSSKQSASGAPTNNGAAGNVTAVKADTKDSVGVSGGSSAGDGSTAKSDSRIGSD
NNQVVTAGGAPSSGAAAGNSTTAKADGKDSVGAPSSGSAGTDTVVKADLNKESDGASGSG
NVDETHKSAPSASPVKSNAEDGGIQSDKSSGNVASTSNQTAVAGEKEDGSSTKNQTLAAS
PVVTKQNETSGASSVGNGSGMNKKETHPPVSAGSLKDHSSQTIAAKAGNHSEVLAKGSST
KQAGGAGGNKKVDWIKEMAGCDMFHGNWVRDDSYPLYPGGSCPHIDEPFDCHLNGRPDRG
YEKLRWQPSGCNIPRLNPTDMLERLRGKRLVFVGDSLNRNMWESLVCILRHSVKDKRKVF
EASGRREFKTEGSYSFLFTDYNCSVEFFRSPFLVQEWETRVSNGNKKETLRLDIVEQSSP
KYKDADFIIFNTGHWWTHEKTALGKDYYQEGSHIYSELNVVDAFHKALITWSRWIDGNVN
PKKTTVMFRGYSASHFSGGQWNSGGSCDKETEPIKNEQYLSTYPPKMSILEDVIHKMRTP
VVYLNITRLTDYRKDAHPSIYRKQHLSEEERRSPERYQDCSHWCLPGVPDSWNELVYAQL
LISQHQMLQQ
>TraesCS7A02G167500.1
MKGLWKQSGLAAMACADAGQLGPAGAGAGRSRRRARLVVYALAVAFAALTAYIALCSPAA
PAGAGVGGAGDGASWFDGVYASTAPYRSHVSTFFSSVFPANSSAPSPEPSRRDGGGAASG
SSEGGGDVSRDVDTKQVGSGAGSGNSATAGSDKQLGSGGSAPSSNAAGAGAPPAGNPAGS
GTAAAKSDSPTNNPATSGGAPASSADRNKGNSTGGGSSSQAGGRGESPTSDSAGERAVPK
ADEGSDGSSKQSGSGAPTNNGAAGNVSAVKADTKDSVGVSGGSPAGDGSAVKSDSKIEPD
NQAVTASGAPSSGSAAGNITTAKADGKDSVGAVNSGSAGSETVVKSDLNNESDGASGSGN
VDETHESAPSATPVKSNAEEGGIQHDKSSGNVVSTSNQTAVAEEKEDESSTKNQTLVASP
IVTKQNQTSGPSSVGSDSAVNKKEATPQVSASSLKDHSSQTIAAKAGNHSEVLAKGSSTK
QAGGAGGNKKVDWIKEMAGCDMFHGNWVRDDSYPLYPGGSCPHIDEPFDCHLNGRPDRAY
EKLRWQPSGCNIPRLNPTDMLERLRGKRLVFVGDSLNRNMWESLVCILRHSVKDTRKVFE
ASGRREFKTEGSYSFLFTDYNCSVEFFRSPFLVQEWETRVSNGNKKETLRLDIVEQSSPK
YKDADFIIFNTGHWWTHEKTALGKDYYQEGSHIYSELNVVDAFHKALITWSRWIDGNVNP
KKTTVMFRGYSASHFSGGQWNSGGSCDKETEPIKNEQYLSTYPPKMSILEDVIHKMRTPV
VYLNITRLTDYRKDAHPSIYRKQHLSEEERRSPERYQDCSHWCLPGVPDSWNELVYAQLL
ISQHQMLQQ
>TraesCSU02G090500.1
MAALVETSMGVVREVLGDSVVDEVDEPIVSYIANVLADQDFDFGPPDGHGIFDALGDLLI
DARCVYDREHCLXVCTKLCEKLGSHGIVKPKAAVRSLATPLRMNAGMEEQVAPKKPENIF
DAPLLSSRDKAKLERNKRKEDRQREAQYQMHVAEMEALRAGMPPVYVNHSNVGGTTIRDI
HMENFSVTVGGRDLIQDVTLTLAFGRHYGLVGRNGTGKTSLLRAMAQHAIDGIPKNCQIL
HVEQEVTGDDTTALQCVLNADVERVQLMQEEAQLGQLLKDLEYEAESKQSLDKSKGDVDK
DSISKRLEEIYKRLEFIDADAAEARAASILAGLSFTPEMQCKNTKSFSGGWRMRIALARA
LFIEPDLLLLDEPTNHLDLHAVLWLETYLLKWPKTFIVVSHAREFLNTVVTDVLHLHGKK
LHAYKGDYDTFERTREEHLKNQMKAFETNEKARGHMQAFIDKFRYNAKRASLVQSRIKAL
ERMEHVDAVVSDPDYKFEFPTPDDRPGPPIISFSDASFGYPGGPILFKNLNFGIDLDSRI
AMVGSNGIGKSTILKLISGDLQPTSGTVFRSPKVRMAVFSQHHVDGLDLTVNPLLYMMRC
FPGVPEQKLRSHLGSFGVTGNLALQSMYTLSGGQKSRVAFAKITFKKPHIILLDEPSNHL
DLDAVEALIQGLLIFQGGVLMVSHDEHLITGSVDELWAVTDGKVAPFPGTFKEYKKMLTT
>TraesCS6A02G409800.1
MAALVETSMGVVREVLGDSVVDEVDEPIVSYIANVLADQDFDFGPPDGHGIFDALGDLLI
DARCVYDREHCLEVCTKLCEKLGSHGIVKPKAAVRSLATPLRMNAGMEEQVAPKKPENIF
DAPLLSSRDKAKLERNKRKEDRQREAQYQMHVAEMEALRAGMPPVYVNHSNVGGTTIRDI
HMENFSVTVGGRDLIQDVTLTLAFGRHYGLVGRNGTGKTSLLRAMAQHAIDGIPKNCQIL
HVEQEVTGDDTTALQCVLNADVERVQLMQEEAQLGQLLKDLEYDAESKQSLDKSKGDVDK
DSISKRLEEIYKRLEFIDADAAEARAASILAGLSFTPEMQCKNTKSFSGGWRMRIALARA
LFIEPDLLLLDEPTNHLDLHAVLWLETYLLKWPKTFIVVSHAREFLNTVVTDVLHLHGKK
LHAYKGDYDTFERTREEHLKNQMKAFETNEKARGHMQAFIDKFRYNAKRASLVQSRIKAL
ERMEHVDAVVSDPDYKFEFPTPDDRPGPPIISFSDASFGYPGGPILFKNLNFGIDLDSRI
AMVGSNGIGKSTILKLISGDLQPTSGTVFRSPKVRMAVFSQHHVDGLDLTVNPLLYMMRC
FPGVPEQKLRSHLGSFGVTGNLALQSMYTLSGGQKSRVAFAKITFKKPHIILLDEPSNHL
DLDAVEALIQGLLIFQGGVLMVSHDEHLITGSVDELWAVTDGKVAPFPGTFKEYKKMLTT
>TraesCS6B02G456000.1
MAALAETSMGVVREVLGDSVVDEVDEPIVSYIANVLADQDFDFGPPDGHGIFHALGDLLI
DARCVYDRDHCLEVCTKLCEKLGSHGIVKPKAAVRSLATPLRMNAGMEEQVAPKKPENIF
DAPLLSSRDKAKLERNKRKEDRQREAQYQMHVAEMEALRAGMPPVYVNHSNVGGTTIRDI
HMENFSVTVGGRDLIQDVTLTLAFGRHYGLVGRNGTGKTSLLRAMAQHAIDGIPKNCQIL
HVEQEVTGDDTTALQCVLNADVERVQLMQEEAQLGQLLKDLEYEAESKQRVDKSKGDVDK
DSISKRLEEIYKRLEFIDADAAEARAASILAGLSFTPEMQCKNTKSFSGGWRMRIALARA
LFIEPDLLLLDEPTNHLDLHAVLWLETYLLKWPKTFIVVSHAREFLNTVVTDVLHLHGKK
LHAYKGDYDTFERTREEHLKNQMKAFETNEKARGHMQAFIDKFRYNAKRASLVQSRIKAL
ERMEHVDAVVSDPDYKFEFPTPDDRPGPPIISFSDASFGYPGGPILFKNLNFGIDLDSRI
AMVGSNGIGKSTILKLISGDLQPTSGTVFRSPKVRMAVFSQHHVDGLDLTVNPLLYMMRC
FPGVPEQKLRSHLGSFGVTGNLALQSMYTLSGGQKSRVAFAKITFKKPHIILLDEPSNHL
DLDAVEALIQGLLIFQGGVLMVSHDEHLITGSVDELWAVTDGKVAPFPGTFKEYKKMLTT
>TraesCS1D02G409400.1
MSRKNASSAAGKKEKPPSVSAMLASMDKPAPNARPAPKPKSSKPSKAPPSSSYMGDIDLP
PSDEEEDEADVAAVTAKAKAKPARATVDLNALAPSDKDAKKKDKREMMAAAAAEAAKREA
LRDDRDAFSVVIGARVPGSAADGDAAVDGNIKDIVLDNFSVSARGKELLKGASLRISHGR
RYGLVGPNGMGKSTLLKLLSWRQVPVPKNIDVLLVEQEIVGDDRSATEAVVAANEELTAL
RAEQAKLEASNDPDDNEKLAEVYEKLNLCDSDAARARASKILAGLGFDQAMQARSTKSFS
GGWRMRISLARALFMQPTLLLLDEPTNHLDLRAVLWLEQYLCSQWKKTLIVVSHDRDFLN
TVCNDIIHLHDKSLHVYRGNFDDFESGYEQKRKEMNKKFELYEKQMKAARKTGSKAAQDK
VKGQALSKAHKEVAKGKGKGKNVATDDDNVKPADLPQKWLDYKVEFHFPEPTLLTPPLLQ
LIEVGFSYPNRPDFKLSDVDVGIDMGTRVAIVGPNGAGKSTLLNLLAGDLTPAEGEARRS
QKLRIGRYSQHFVDLLTMEENAVQYLLRLHPDQEGMSKAEAVRAKLGKFGLPGHNHLTPI
VKLSGGQKARVVFTSISMSHPHILLLDEPTNHLDMQSIDALADALDEFTGGVVLVSHDSR
LISRVCADEQKSQIWVVEDGTVSKYDGSFEDYKDELMAEIKKEVEE
>TraesCS3D02G349700.1
MSRKNASSSTSAAATSRKNAPSSSSAAGAASKKEKPLSVSAMLASMDGTAPKSKPAKAAP
KPKPSKAPASSYMGGIDLPPSDDEEDEADVAAVAAKPKPSRATVDLNALAPSDKDSKKKE
KREMMAAAVAEAAKREALRDDRDAFSVVIGARVPGSAAEGDAADGNIKDIVLDNFSVSAR
GKELLKGASLRISHGRRYGLVGPNGMGKSTLLKLLSWRQVPVPKNIDVLLVEQEIVGDDR
SATEAVVAANEELTALRAEQAKLEASDDPDDNEKLAEVYEKLNLCDSDAARARASKILAG
LGFDQAMQARSTKSFSGGWRMRISLARALFMQPTLLLLDEPTNHLDLRAVLWLEQYLCSQ
WKKTLIVVSHDRDFLNTVCNDIIHLHDKSLHVYRGNFDDFESGYEQKRKEMNKKFEVYEK
QMKAARKTGSKAAQDKVKDQAMSKAHKEVAKGKGKGKNVATDDDNVKPADLPQKWHDYKV
EFHFPEPTLLTPPLLQLIDVGFGYPNRPDFKLSDVDVGIDMGTRVAIVGPNGAGKSTILN
LLAGDLNPSEGEARRSQKLRIGRYSQHFVDLLTMEENAVQYLLRLHPDQGGMSKAEAVRG
KLGKFGLPGHNHLTPIVKLSGGQKARVVFTSISMSNPHILLLDEPTNHLDMQSIDALADA
LDEFTGGVVLVSHDSRLISRVCDDEEKSQIWVVEDGTVTKYDGSFEDYKDELMAEIKKEV
EE
>TraesCS3B02G388600.1
MSRKNASSSTSAAATSRKNAPSSSSAAGAAGKKEKPLSVSAMLASMDGTAPKSKPAKAAP
KPKPSKAPASSYMGGIDLPPSDDEEDEADVVAVAAKPKPSRATVDLNALAPSDKDSKKKE
KREMMAAAVAEAAKREALRDDRDAFSVVIGARVPGSAADGDAADGNIKDIVLDNFSVSAR
GKELLKGASLRISHGRRYGLVGPNGMGKSTLLKLLSWRQVPVPKNIDVLLVEQEIVGDDR
SATEAVVAANEELTALRAEQAKLEASNDPDDNDKLAEVYEKLNLCDSDAARARASKILAG
LGFDQAMQARSTKSFSGGWRMRISLARALFMQPTLLLLDEPTNHLDLRAVLWLEQYLCSQ
WKKTLIVVSHDRDFLNTVCNDIIHLHDKSLHVYRGNFDDFESGYEQKRKEMNKKYEVYEK
QMKAARKTGSKAAQDKVKDQAMSKAHKEVAKGKGKGKNVANDDDNVKPADLPQKWHDYKV
EFHFPEPTLLTPPLLQLIDVGFGYPNRPDFKLSDVDVGIDMGTRVAIVGPNGAGKSTILN
LLAGDLNPSEGEARRSQKLRIGRYSQHFVDLLTMEENAVQYLLRLHPDQGGMSKAEAVRG
KLGKFGLPGHNHLTPIVKLSGGQKARVVFTSISMLNPHILLLDEPTNHLDMQSIDALADA
LDEFTGGVVLVSHDSRLISRVCDDEEKSQIWVVEDGTVTKYDGSFEDYKDELMAEIKKEV
EE
>TraesCS1B02G430800.1
MSRKNASSAAGKKDKPLSVSAMLASMDKPAPNARPAPKPKSSKPSKAPPSSSSYMGDIDL
PPSDEEEDEADVAAVTAKAKAKAKPARAAVDLNALAPSDKDAKKKDKREMMAAAAAEAAK
REALRDDRDAFSVVIGARVPGSAADGDAAAVDGNIKDIVLDNFSVSARGKELLKGASLRI
SHGRRYGLVGPNGMGKSTLLKLLSWRQVPVPKNIDVLLVEQEIVGDDRSATDAVVAANEE
LTALRAEQAKLEASNDPDDSEKLAEVYEKLNLCDSDAARARASKILAGLGFDQAMQARST
KSFSGGWRMRISLARALFMQPTLLLLDEPTNHLDLRAVLWLEQYLCSQWKKTLIVVSHDR
DFLNTVCNDIIHLHDKSLHVYRGNFDDFESGYEQKRKEMNKKFEVYEKQMKAARKTGSKA
AQDKVKGQALSKAHKEVAKGKGKGKNVATDDDNVKPADLPQKWLDYKVEFHFPEPTLLTP
PLLQLIEVGFSYPNRPDFKLSDVDVGIDMGTRVAIVGPNGAGKSTLLNLLAGDLTPAEGE
ARRSQKLRIGRYSQHFVDLLTMEENAVQYLLRLHPDQEGMSKAEAVRARLGKFGLPGHNH
LTPIVKLSGGQKARVVFTSISMSHPHILLLDEPTNHLDMQSIDALADALDEFTGGVVLVS
HDSRLISRVCADEQISQIWVVEDGTVSKYDGSFEDYKDELMAEIKKEVEE
>TraesCS3A02G355700.1
MSRKNASSSSSAAATSRKNAPSSSSAAGAAGKKEKPLSVSAMLASMDGTAPKSKPAKAAP
KPKPSKAPASSYMGGIDLPPSDDEEDEADVAAVAAKPKPARATVDLNALAPSDKDSKKKE
KREMMAAAVAEAAKREALRDDRDAFSVVIGARVPGSAAEGDAADGNIKDIVLDNFSVSAR
GKELLKGASLRISHGRRYGLVGPNGMGKSTLLKLLSWRQVPVPKNIDVLLVEQEIVGDDR
SATEAVVAANEELTALRAEQAKLEASNDPDDNDKLAEVYEKLNLCDSDAARARASKILAG
LGFDQAMQARSTKSFSGGWRMRISLARALFMQPTLLLLDEPTNHLDLRAVLWLEQYLCSQ
WKKTLIVVSHDRDFLNTVCNDIIHLHDKSLHVYRGNFDDFESGYEQKRKEMNKKFEVYEK
QMKAARKTGSKAAQDKVKDQAMSKAHKEVAKGKGKGKNVANDDDNVKPADLPQKWHDYKV
EFHFPEPTLLTPPLLQLIDVGFGYPNRPDFKLSDVDVGIDMGTRVAIVGPNGAGKSTILN
LLAGDLNPSEGEARRSQKLRIGRYSQHFVDLLTMEENAVQYLLRLHPDQGGMSKAEAVRG
KLGKFGLPGHNHLTPIVKLSGGQKARVVFTSISMSNPHILLLDEPTNHLDMQSIDALADA
LDEFTGGVVLVSHDSRLISRVCDDEEKSQIWVVEDGTVTKYDGSFEDYKDELMAEIKKEV
EE
>TraesCS7D02G054900.1
MMAAAVAEAAKREALRGAFSVVIGARVPGSAAEGDVADGNIKDIVLDNFSVSVRGNELLK
GASLRISHGRRYGLVGPNGMGKSTLLKLLSWRQVPVPKNIDVLLVEQQIVGDDRSATEAV
VAANEELTALRAEQAKLEASNDPDDNDKLAEVYEKLNLCDSDAARAGASKILAGLGFDQA
MQARSTKSFSGGWRMRISLDRALFMQPTLQLLDEPTNHLDLRAVLWLEQYLCSQWKKTLI
LSLHVYRGNFDDFESGYEQKRKEMNKKFEVYEKQMKAARKTGSKAAQDKVKDQAMSKAHK
EVAKGKGKGKNVASDDDNVKLADLPQKWHDYKVEFHFPEPTLLTPPLLQLIDVGFGYPNR
PDFKLSDVDVGIDMGTRVAIVGPNGAGKSTILNLLAGGLNPSEREARRSQKLRIGRYSQH
FVDLLTMEENAVQYLLRLHPDQGGMSKAEVVRGNLGKFGLPGHNHLTPIVKLCGGQKARV
PTNHLDMQSIDALADALDEFTGGLVLVSHDSRLISRVCDDEEKIQIWVVEDGTVTKYDGS
FEDYKDELMAEIKKEVEE
>TraesCS4B02G160600.1
MATMDVLSAKLLRSSLHPHAPFLPCPSLPSRRYRRPSSIYCRLTTSSLSSSSAATTSEGD
ANQDLSALLSDESTTDAPGAGSRKKRSNSGASSIPSGVRLENISKSYKGVTVLKDVSWEV
QRGEKVGLVGVNGAGKTTQLRIIAGLEEPDGGNVVKAKENMKIAFLSQEFEVCASRTVRE
EFLSAFQEEMGVKTCLDQVQAALERATEDMDLMGRLLDELDLLQRQSQDVDLGMVDVKIQ
KLMPELGFVPEDADRLVASFSGGWKMRMSLGKILLQDPDLLLLDEPTNHVDLDTIEWLES
YLKTQDVPMVIISHDRAFLDQCCTKIVETEFGVSKTYKGNYSGYVLAKAIWVETQRAAWE
KQQKEIEHTRELISRLGAGASSGRASSEQKKLEKLEKEGLIEKPFQRKQLKIRFPERGRS
GRTVLAINNLKFGFGDKILFNNANLIVERGEKIAIIGPNGCGKSTLLKLALGMEKPQEGE
VILGEHNVLPNYFEQNQAEALDLEKTVLDTVAEAAEDWKIDDIKGLLGRCNFRDDMLNRK
VWFLSGGEKARLSFCKFMVTPSTLLILDEPTNHLDIPSKEMLEEAISEYMGTVITVSHDR
YFVKQIVNRVIEVKDQTIQDYQGDYNYYLERNLEAGERELARAEELEEKAPKVKAKSKMS
KAEKLARKKQKVQAFQQSKQKSKSMKNSKRWN
>TraesCS4D02G149400.1
MATMDVLSAKLLRSSLHPHAPCLPCPSLPSRRYRRPSSIYCRLTTSSLPSSSAATTSEGD
ANQDLTALLSDESTTAAPGAGSRKKRPNSGASSIPSGVRLENISKSYKGVTVLKDVSWEV
QRGEKVGLVGVNGAGKTTQLRIIAGLEEPDGGNVVKAKENMKIAFLSQEFEVCASQTVRE
EFFSAFQEEMGVKTRLDQVQAALERATEDMDLMGRLLDELDLLQRQSQDVDLGMVDVKIQ
KLMPELGFVPEDADRLVASFSGGWKMRMSLGKILLQDPDLLLLDEPTNHVDLDTIEWLES
YLKTQDVPMVIISHDRAFLDQCCTKIVETEFGVSKTYKGNYSGYVLAKAIWVETQRAAWE
KQQKEIEHTRELISRLGAGASSGRASSEQKKLEKLEKEGLIEKPFQRKQLKIRFPERGRS
GRTVLAIHNLKFGFGDKILFNNANLIVERGEKIAIIGPNGCGKSTLLKLALGTEKPQEGE
VILGEHNVLPNYFEQNQAEALDLEKTVLDTVAEAAEDWKIDDIKGLLGRCNFRDDMLNRK
VRFLSGGEKARLSFCKFMVTPSTLLILDEPTNHLDIPSKEMLEEAISEYTGTVITVSHDR
YFVKQIVNRVIEVKDQTIQDYQGDYNYYLERNLEARERELARAEELEEKAPKVKAKSKMS
KAEKLARKKQKVQAFQQSKQKSKSMKNSKRWN
>TraesCS4A02G156300.1
MATMDVLSAKFLRSCLHPHAPFLPCPSLPSRRYRQPFSIYCRLSTSSPSSSSAATTSEGD
ANQDLSALLSDESTTAAPGAGSRTKRPNSGASSIPSGVRLENISKSYKGVTVLKDVSWEV
QRGEKVGLVGVNGAGKTTQLRIIAGLEEPDGGNVVKAKENMKIAFLSQEFEVCASRTVRE
EFLSAFQEEMGVKTRLDQVQAALERATEDMDLMGRLLDELDLLQRQSQDVDLGMVDVKIQ
KLMPELGFVPEDADRLVASFSGGWKMRMSLGKILLQDPDLLLLDEPTNHVDLDTIEWLES
YLKIQDVPMVIISHDRAFLDQCCTKIVETEFGVSKMYKGNYSEYVLAKAIWVETQRAAWE
KQQKEIEHTRELISRLGAGASSGRASSEQKKLEKLEKEGLIEKPFQRKQLKIRFPERGRS
GRTVLAINNLKFGFGDKILFNNANLIVERGEKIAIIGPNGCGKSTLLKLALGTEKPQEGE
VILGEHNVLPNYFEQNQAEALDLEKTVLDTVAEAAEDWKIDDIKGLLGRCNFRDDMLNRK
VRFLSGGEKARLSFCKFMVTPSTLLILDEPTNHLDIPSKEMLEEAISEYTGTVITVSHDR
YFVKQIVNRVIEVKDQTIQDYQGDYNYYLERNLEARERELARAEELEEKAPKVKAKSKMS
KAEKLARKKQKVQAFQQSKQKSKSMKNSKRWN
>TraesCS2D02G360400.1 CDS sequence
ATGGCCGGCTGGAGGAAGGCGTGGCTGTCCGTGCTGGACCGGGGCGGCGGCGGCGGCGGC
GGCGGGGGCAGCAGCGGCTCCCTCCAGGCGCACCTCAACGGCCTCCTCTCCCCGTCCTCC
TCCTCCTCCTCCCTCGCCACCGCCCACAAGCGAGGCAGCTTCCCGGGCGGTAAGCACGGC
GGCGGGACGTTCGTGAGCACCAAGGCCGCGCTGGCCTGCTTCTCCGTCGTCCTGGTGATC
GCCTTCTTCTACGTCTCCATCACCGGTCGCCCCGCCGCCGAGGACTCCTTCCCCACCCCG
ACGGGCTCCTCGCCGGCGTCCGGCGCGCTGCTGTCGTCGAACTCGTCCACGCCGACGTCG
CCGAGAAAGCCGCTTCCTCCCCGCCCTCCCGTTTCTCCTCATGTAAGTAGCACCGGCACG
GCTCAGCGGAGCAGCGCGCGCAATGCCACGGTGGTGTCGCCGCGTCGAGTGCAGAGCAAC
AACTCGGATGATGACTGGGCGCCGACCGATGGCTCGGGACAGCCGGCATTGGTGCCGGAG
GATATTGGAAAAGCGCAGGATCCCCTCTATAACGCCGGAAACGCCACGATCAGCGAATCG
GACGGGGAGCCCGTCGTCGGCAACGGCACTAAAGCGCAAGATGTAACCGCAATGCCGACG
CCGCCGTGGCGGAGAGCGGACGCAGCGAATTCCACCGGGAAACCCATTATCAGCGCTCCG
GACGAGCCTTCAGACTCCGAAGGCGCCACCGGAAACTCTACCGACACGGTTGTGCGTTCG
AGTAAGGAAGATCGAAACGCGAACGCCAGCGTCGACAATGTACTGCCGACCTCGACGCGG
CGAGCAGCGCTTCCATCTACACCGCCGGGCCAGCGAAAGGAGGACAGACGCAGGCGCAAG
AGAGCTTCCATGTCGAGGCACAAGCAGCGCTCGATCAGGCGACGGAAGGAGTTCGTCCAC
CCGGTGCAGGAAGGAGCTGCCGCCGACCACAGCGATGGCGCCGGCATCGGCACGGCAGGC
GCCAACACCAGCTCCGGTAACCACAGCGACGTCATCGGCATCGTCGGGGCCGGCAACCAC
CAGGTGGTGTGGACGTCCTCCGCCGACCACAGCGACGGCGCCGGCACTGGCACCGTCACG
GCAGGCGCGAACACCAGCGTTGCCGTCGGCCCAGTCAACCACCGGGTGGAGTGGACGCCT
TCCGCCGAACACAGCGACGCCGCCGGCACTGGCACCGTCACGGCAGCCGCGAACACCAGC
TTGGCCGTCGGGCCCGGCAACCACCGGGTGGTGTGGACGTCGGGCGTGCAGGACCTGGTG
ACCTTCGCCAAGTGCGATCTGTTCAGCGGGAGGTGGGTGAGGGAGGAGAACCACGCGTTC
TACCCGCCGCGGTCGTGCCCCCACATCGACGGCGACTTCAACTGCCACAAGAACGGCCGG
CAGGACACCGGCTTCCTCAACTGGAGGTGGCAGCCCAGCGGCTGCAACATTCCCAGGATG
AACGTGACTGATTTCCTGGAGAGGCTGCGGGGCCAGAGGATCATATTCGTCGGCGACTCG
CTGAACCGCAACATGTGGGAGTCTCTGGTCTGCATTCTCCGCCATGGTGTCAGGAATAAG
AAGAACGTGTACGAGAAGTCCGGGAAGAACCAGTTCAAAACCAGAGGATTCTATTCCTTC
AAGTTCAGAGACTACAATTGCTCTGTGGATTTCATAAGATCGACATTTCTGGTCAAAGAG
ACGGTCCGCGAGAGCCCAAACGGCACCGTACTCGACGAGAAGCTGAGGTTGGATGAGCTA
GACGCAACGACTCCGGCGTACCAGACCGCCGACATCGTCGTCGTCAACACCGGGCACTGG
TGGACTCACCCAAAGACGTCAAAAGGGCTGAACTATTACCAAGAAGGCTACCGCGTGCAC
CATAGCCTTGAGGTGATGGAGGCATACAGGAAAGCACTGACCACATGGGCTAAATGGGTC
GACAAGAACATAGACCCAACAAGAACTCAGATCGTGTTCAGAGGACTCTCCCTAACACAC
TTCAAGGGAGGGCAGTGGAACTCAGGAGGGCGATGCCACAGGGAGACCGAGCCGATATTC
AGCCAGACGTACCTCACCGAGTACCCTGAGAGGATGAGGATACTGGAGAAGGTCATGAGC
AGGATGAAGACCCCTGTGATATACCTCAACATCAGCAGGCTCACCGACTACCGGAAGGAC
GGCCACCCGTCGGTGTACCGGGTGCGCTACGACACGGAGGAGGAGCGGATGGCGGCGGTG
GCGACCAAGCAGGACTGCAGCCACTGGTGCCTGCCGGGCGTGCCGGACACTTGGAATGAG
CTGCTCTATGCCTCGCTGCTCCAGGCAGGCAAAGGTCCCTGGAGACTATGA
>TraesCS2B02G381000.1 CDS sequence
ATGGCCGGCTGGAGGAAGGCGTGGCTGTCCGTGCTGGACCGGAGCGGCGGCGGCGGCGGC
GGCGGGGCCAGCAGCGGCTCCCTCCAGGCGCACCTCAACGGCCTCCTCTCCCCGTCCTCC
TCCTCCACCTCCCTCGCCACCGCCCACAAGCGAGGCAGCGGCGCCGGCGGTAAGCACGGC
GGCGGGCCGTACGTGAGCACCAAGGCCGTGCTGGCCTGCTTCTCCGCCGTCCTGGTGATC
GCCTTCTTCTACATCTCCGTCACCGGTCGCCCCTCCCCCGACGACTCCTTCCCCACCCCG
ACGGGCTCCTCGCCGGCGTCCGGCGCGCTGCTGTCGTCGAACTCGTCCACGCCGACGTCG
CCGAGGAAGCCGCTTCCTACCCACCCTCCCGTTCTTCCTAACGTAAGTAGCACCGGCACG
GCTCAGCGGAGCAGCGCGCGCAATGCCACCGTGGTGTCGCCGAGTCGAGTACAGAGCAAC
AACTCGGATGATGACTGGGCGCCGGCCGATGGCTCGGGACAGCCGGCATTGGTGCCGGAG
GATATGGGGAAAGCGCAGGGTCCCCTCTATAACGCCGAAAACGCCACGATCAGCGGATCG
GACGGGGAGCCCGTCGTCGGCAACGGCACTAAAGCGCAAGATGTAACCGCAATGCCGACG
CCGGCGTGGCGGAGAGCGGATGCAGCGAATTCCACAGGAAAACCCATCATCGGGGGCTCT
CCTGATGAGCCCGCGGACTCCGAAGGCGCCACCGGCAACTCTACCGACACGGTTGTGCGT
TCGAGTAAGGAAGATCGAAACGCGAACGCCAGCGTCGACAATGTACCGCCGAACTCGACG
CGGCGAGCAGCGCTGCCATCAACAGCGCCGGGTCAGCGAAAGGAGGACAGACGCAGGCGC
AAGAGAGCGTCCATGGCGAGGCACAAGCAGCGCTCGATCAGGCGACGGAAGGAGTTCGTC
CACCCGGTGCAGGAAGGAGCTGCCGCCGACAACAGCGACGGCATTGCCACGGCAGGCGCG
AACACCAGCGTTGCCATCGGGCCAGGCAACCACCAGGTGGTGTGGACGTCCTCCGCCGAC
CATAGCGACGGCGCCGGCACTGGCACCGTCACGGCAGGCGCGAACACCAGCGTTGCCGTC
GGGCCAGGCAACCACCGGGTGGAGTGGACGCCTTCCGCCGACCACAGCGACGGCGTCGGC
ACTGGCACCGTCACGGCAGCCGCGAACACCAGCGTGTCCGTCGGGCCCGGCAACCACCGG
GTGGTGTGGACGTCGGGCGTGCAGGACCTGGTGACCTTCGCCAAGTGCGATCTGTTCAGC
GGGAGGTGGGTGAGGGAGGAGAACCACGCGTTCTACCCGCCGCGGTCGTGCCCCCACATC
GACGGCGACTTCAACTGCCACAAGAACGGCCGTCAGGACACCGGCTTCCTCAACTGGAGG
TGGCAACCGACCGGCTGCAACATTCCCAGGATGAACGCGTCTGATTTCCTGGAGAGGCTG
CGGGGCCAGAGGATCATATTCGTCGGCGACTCGCTGAACCGCAACATGTGGGAGTCTCTG
GTCTGCACTCTCCGCCATGGTGTCAGGAACAAGAAGAACGTGTACGAGAAGTCCGGGAAG
AACCAGTTCAAAACCAGAGGATTCTATTCCTTCAAGTTCAGAGACTACAATTGCTCTGTG
GATTTCATAAGATCGACATTTCTGGTCAAAGAGACGGTCCGCGAGAGCCCAAACGGCACC
GTACTCGACGAGAAGCTGAGGTTGGATGAGCTAGATGCAACGACTCCGGCGTACCAGACT
GCCGACATCGTCGTCGTCAACACCGGGCACTGGTGGACTCACCCAAAGTCGTCAAAAGGG
CTGAACTATTATCAAGAAGGCAACCGTGTGCACCATAGCCTTGAGGTGATGGACGCATAC
ATGAAAGCACTGACCACATGGGCTAAATGGGTCGACAAGAACATAGACCCAACAAGAACT
CAGATCGTGTTCAGAGGACTCTCCCTAACACACTTCAGGGGAGGGCAGTGGAACTCCGGA
GGGAGGTGCCACAGGGAGACCGAGCCGATATTCAACCAGACGTACCTCACCGAGTACCCC
AAGAGGATGAGAATGCTGGAGAAGGTCATGAGCAGGATGAAGACCCCTGTGATATACCTC
AACATCAGCCGGCTCACCGACTACCGGAAGGACGGCCACCCGTCGGTGTACCGGGTGCGC
TACGAGACGGAGGAGGAGCGGATGGCGGCGGCGGCGACCAAGCAGGACTGCAGCCACTGG
TGCCTGCCGGGCGTGCCGGACACATGGAACGAGCTGCTGTATGCCTCGCTGCTCCAGGCA
GGCAAAGGCCCCTGGAGACTATGA
>TraesCS2A02G363100.1 CDS sequence
ATGGCCGGCTGGAGGAAGGCGTGGCTGTCCGTGCTGGACCGGGGCGGCGGCGGCGGCGGG
GGCAGCAGCGGCTCCCTCCAGGCGCACCTCAACGGCCTCCTCTCCCCGTCCTCCTCCTCC
TCCTCCCTCGTCACCGCCCACAAGCGAGGCAGCGGCCTCGGCGGTAGGCACGGCGGCGGG
CCGTACGTGAGCACCAAGGCCGCGCTGGCCTGCTTCTCCGTCGTCCTCGTGATCGCCTTC
TTCTACGTCTCCATCACCGGTCGCCCCGCCGCCGAGGACTCCTTCCCCACCCCGACGGGC
TCCTCGGCGGCGTCCGGCGCGCTGCTGTCGTCGAACTCGTCCACGCCGACGTCGCCGAGG
AAGTCGCCTCCTCCCCACCCACCCATTTCTCCTAATGTAAGTAGCACTGGCAACGCAACC
GTGGTGGCGCCGCGTCGAGTGCAGAGCAACAACTCGGATGATTACTGGGCGCCGGCCGAT
GGCTCGGGGCAGCCGGCATTGGTGCCGGAGGAGGATATGGGGAAAGCGCAGGGTCCCCTC
TATGACGCCGGAAACGCCACGATCAGCGGATCGGACGAGGAGCCCGTCGTCGGCAACGGC
ACTAAAGCGCAAGATGTAACCGCAATGCCGACGCCGCCGTGGCGGAGAGCGGATGCAGCG
AATTCCACCGGAAACCCCATCATCGGCGCTCCCGATGAGCCCTCGGACTCCGACGGCGCC
ACCGGGAACTCTACCGACACGGCTGTGCCTTCGAGTAAGGAAGATCGAAACGCGAACGCC
AGCGTCGACAATGTACCGCCGAACTCGACGCGGCGAGCAGCGCTGCCATCTAGAACGCCG
GATCAGCGAAAGGAGGACAGACGCAGGCGCAAGAGAGCGTCCATGGCGAGGCACAAGCAG
CGCTCGACCAGGCGACGGAAGGAGTTCGTCCACCCGATGCAGGAAGTAGCTGCCGCCGAC
AACAGCGACGGCACCGGTACCGGCACCGGCACGGCAGGCGCGAACACCAGAGTTGCCAGC
GGGTCAGGCAACCAACGGGTGGTGTGGACGTCTGCCGCCGACCACAGCGACGGCGCCGGC
ACCGGCACCGTCACGGCAGGCGCGAACACCAGCGTTGCCGTCGGCCCAGTCAACCACCGG
GTGGAGTGGACGCCTTCCGCCGACCACAGCGATGACACCGGCACTGGCACCGTCACGGCA
GGCGCGAACACCAGCGTGGCCGTCGGGCCCGGCAACCACCGGGTGGTGTGGACGTCGGGC
GTGCAGGACCTGGTGACCTTCGCCAAGTGCGACCTGTTCAGCGGGAGGTGGGTGAGGGAG
GAGAACCACGCCTTCTACCCGCCGCGGTCGTGCCCCCACATCGACGGCGACTTCAACTGC
CACAAGAACGGCCGGCAGGACACCGGCTTCCTCAACTGGAGGTGGCAGCCGACCGGCTGC
AACATTCCCAGGATGAACGTGACTGATTTCCTGGAGAGGCTGCGAGGCCAGAGGATCATA
TTCGTCGGAGACTCGCTGAACCGCAACATGTGGGAGTCTCTGGTCTGCACTCTCCGCCAT
GGCGTCAGGAACAAGAAGAACGTGTACGAGAAGTCCGGGAAGAACCAGTTCAAAACCAGA
GGATTCTATTCCTTCAAGTTCAGAGACTACAATTGCTCTGTGGATTTCATAAGATCGACA
TTTCTGGTCAAAGAGACGGTCCGCGAGAGCCCAAACGGCACCGTACTCGACGAGAAGCTG
AGGTTGGATGAGCTAGACGCAACGACTCCGGCGTACCAGACCGCCGACATCGTCGTCGTC
AACACCGGGCACTGGTGGACTCACCCAAAGACGTCAAAAGGGCTCAACTATTATCAAGAA
GGCTACCGTGTTCACCACAGCCTTGAGGTGATGGAGGCATACAGGAAAGCACTGACCACA
TGGGCCAAATGGGTCGACAAGAACATAGACCCAACAAGAACTCAGATCGTGTTCAGAGGA
CTCTCCCTAACACACTTCAAGGGAGGGCAGTGGAACTCGGGAGGGAGATGCCATAGGGAG
ACCGAGCCGATATTCAACCACACGTACCTCACCGAGTACCCCGAGAGGATGAGAGTACTG
GAGAAGGTCATGAGCCGGATGAAGACCCCTGTGATATACCTCAACATCAGCCGGCTCACC
GACTACCGGAAGGACGGCCACCCGTCGGTGTACCGGGTGCGCTACGACACGGAGGAGGAG
CGGATGGCGGCGGCGGCGACCAAGCAGGACTGCAGCCACTGGTGCCTGCCGGGCGTGCCG
GACACGTGGAATGAGCTGCTGTATGCCTCGCTGCTCCAGGCAGGCAAAGGTTCCTGGAGA
CTATGA
>TraesCS7B02G072300.1 CDS sequence
ATGAAGGGCCTGTGGAAGCAGAGCGGGCTGGCGGCCATGGCGTGCGCCAACACGGACCAG
CTCGGCCCGTCCGGCGCCGGGGCGGGACGCTCCCGCAGGCGCGCGAGGCTCGTGGTGTAC
GCCCTCGCGGTGGCCTTCGCCGCATTGACCGCCTACATCGCCCTCTGCTCGCCCGCGGCC
CCCGCCGGCGCGGGCGTCGGTGGGGGCGGGGACGGAGCCTCGTGGTTCGACGGCGTGTAC
GCTTCCACGGCGCCGTACCGCTCGCAGGTATCGACCTTCTTCTCCTCCATCTTCCCCACC
AACTCGTCCGCCCCCTCGCCCGAGCCGCCTCGCCGCGACGGCGGTGGCTCGGCCGGCGGA
TCGAGCGAGGGGGGCGGCGAGGTGAATCGCGATGTGGATGGTAAGCGAGTCGGAAGCGGA
GCAGGGAGCAGTAATTCCGCTACGGCTGGGTCTGAGAAGCAGTTGGGGAGTGGAGGTAGT
GCGCCAAGCAGCAATGCCGCCGGTGGCAGTGCACCGTCAGCCGTGAACCCAGCGGGAGGT
GGCACGGCCGCCGCCAAGAGCGATTCTCCGACGAATAATCCTGCCACAAGTGGCAGTGCG
CCGGTTAGTTCGGCAGATCGGAATAAAGGTAACTCTACTGGAGGCGGTTCTAGTAGCCAG
GCAGGGGGTGGTGGTGGATCCCCAACCAGTGATTCAGCCGGAGAAAGAACCGTGGCGAAG
GCCGACGAGGAGAGTGATGGATCAAATAAGCAGTCGGGAAGCGTAGCTCCGACGAATAAT
GGCGCCGCTGGAAATGTCAGCGCGGTGAAGGCTGACACCAAGGATTCAGTTGTAGTCTCT
GCCGGAGATGGCAGCACCGCGAAGTCTGATTCCAAAATTGGGTCTGATAGTCAGGCAGTG
ACTGCAGGCGGTGCTCCGAGCAGTGGTTCTGCTGCTGGAAATAGCACCACAGCGAAGGCT
GGTGGAAAGGATTCAGTTGGTGCGGCGAGCAGTGGCTCGGCCGCAACTGACACAGTTGTG
AAGGCTGATCCAAATAATGAGTCTGATGGTGCATCAGGGAGTGGAAATGTAGATGAAACC
AATAAATCAGCACCAAGTGCTACTCCAGTGAAGAGCAATGCTGAAGATGGAGGAATTCAG
CGCGATAAAGCGAGTGGGAATGTGGCTTCAACTAGTAATCAGACTGCAGTGGCAGGGGAG
AAGGAAGATGGATCTTCAACCAAGAACCAGACCCTTGTAACATCTCCAATTGCGACGAAA
CAGAACCAGACGAGTGTACCTTCTTCTGTTGGAAGTGGTAGTGCTGTGAATAAGAAGGAA
ACAACTCCCCAGGTTAGTGCAGGTTCACTGAAGGATCATTCATCCCAAACAATCGCCGCA
AAAGCTGGGAATCACAGCGAAGTTCTGGTCAAGGGGAACGTGTCATCAACTAAACAAGCC
GGTGGTGCCAGTGGAAATAAGAAGGTTGACTGGATAAAGGAGATGGCCGGCTGTGACATG
TTCCATGGGAACTGGGTTCGGGACGACTCGTACCCTCTCTACCCCGGGGGATCGTGTCCT
CACATTGATGAACCCTTCGACTGCCATCTCAATGGTCGGCCGGACCGAGCTTATGAGAAG
CTCCGGTGGCAACCCAGTGGATGCAACATCCCAAGATTGAATCCAACCGACATGTTGGAG
AGGCTGAGGGGGAAAAGACTAGTTTTTGTTGGCGATTCACTCAACAGGAACATGTGGGAA
TCTCTGGTTTGTATATTGAGGCATTCTGTCAAGGACAAGAGGAAGGTTTTTGAGGCTTCT
GGTAGGCGCGAGTTTAAGACCGAGGGCTCATACTCTTTCCTGTTCACGGACTACAACTGC
AGTGTGGAGTTCTTCCGCTCTCCTTTCCTAGTTCAAGAGTGGGAGACACGAGTCAGCAAT
GGAAATAAAAAGGAAACCCTTAGGCTTGACATTGTCGAGCAATCATCACCAAAGTACAAG
GATGCAGACTTCATCATTTTCAATACTGGACACTGGTGGACACATGAAAAAACTGCCCTA
GGGAAGGACTATTACCAGGAAGGTAGTCACATATATAGTGAGTTAAATGTCGTGGACGCC
TTTCATAAAGCCCTTATCACCTGGTCCAGATGGATTGACGGCAACGTAAATCCCAAGAAA
ACCACTGTGATGTTCAGAGGCTACTCAGCGTCTCATTTCAGTGGCGGGCAATGGAATTCA
GGAGGCAGCTGCGACAAGGAGACCGAACCAATAAAAAATGAACAATACCTTTCAACCTAC
CCACCAAAGATGAGCATTTTGGAGGATGTGATCCACAAGATGAGAACCCCGGTTGTTTAC
TTGAACATAACAAGATTGACGGACTATAGAAAGGATGCACACCCCTCGATCTACCGCAAG
CAACACCTGAGCGAGGAGGAGAGGAGGTCGCCTGAGAGATACCAGGACTGCAGCCACTGG
TGTCTCCCCGGGGTACCGGATTCCTGGAACGAGCTGGTTTACGCCCAACTTTTGATCAGT
CAGCATCAGATGCTCCAACAGTAA
>TraesCS7D02G168300.1 CDS sequence
ATGAAGGGCCTGTGGAAGCAGAGCGGGCTGGCGGCCATGGCTAGCGCCGACGCGGGCCAG
CTCGACCCGGCCGGCGCCGGGGCGGGGCGCTCCCGCAGGCGCGCGAGGCTCGTGGTGTAC
GCCCTCGCGGTGGCCTTCGCCGCATTGACGGCCTACATCGCCCTCTGCTCGCCCGCGGCC
CCCGCCGGCGCGGGCGTCGGCGGGGGCAGGGACGGAGCCTCGTGGTTCGACGGCGTGTAC
GCCTCCACGGCGCCGTACCGCTCGCAGGTCTCGACCTTCTTCTCGTCCGTCTTCCCCACC
AACTCGTCCGCCCCCTCGCCCGAGCCGTCTCGCCGCGACGGCGGTGGCGCCGCCAGCGGA
TCGAGCGAGGGAGGCGGCGAGGTGAATCGCGATGTGGATAGTAAGCAAGTCGGGAGCGGA
GCAGGGAGCAGCAGTTCCGCTACGGCTGGGTCTGACAAGCAGTTGGGGAGTGGAGGTAGT
GCGCCAAGCAGCAATGCCGCCGGCGCCGGTGCACCGCCGGCCGGAAGCCCAGCGGGAAGT
GGCACGGCCGCCGCCAAGAGCGATTCTCCGACGAATAATTCTGCAACGAGTGGCGGTGCG
CCGATTAGTTCGGCAGATCGGAATAAAGGCAACTCTACTGGAGGCGATTCTAGTAGCCAG
GCAGGGGGTGGTGGTGAATCCCCAACCAGTGATTCCGCCGGAGAAAGAACCGTGGCGAAG
GCCGACGAGGAGAGTGATGGATCCAGTAAGCAGTCGGCAAGCGGAGCTCCGACCAATAAT
GGCGCTGCTGGAAATGTCACCGCGGTGAAGGCAGACACCAAGGATTCAGTTGGAGTCTCC
GGCGGTAGTTCTGCCGGAGATGGCAGCACAGCGAAGTCCGATTCCAGAATTGGGTCTGAT
AATAACCAGGTAGTGACTGCAGGCGGTGCTCCGAGCAGTGGTGCTGCTGCTGGAAATAGC
ACCACAGCCAAGGCTGACGGGAAGGATTCAGTTGGTGCACCGAGCAGTGGCTCGGCCGGA
ACTGACACAGTTGTGAAGGCTGATCTGAATAAAGAGTCTGATGGTGCATCAGGGAGTGGA
AATGTGGATGAAACCCATAAATCAGCACCAAGTGCTAGTCCAGTGAAGAGCAATGCCGAA
GATGGCGGAATTCAGAGCGATAAATCAAGTGGGAATGTGGCTTCAACTAGTAATCAGACT
GCAGTGGCAGGGGAGAAAGAAGATGGATCTTCAACCAAGAACCAGACCCTTGCAGCATCT
CCAGTTGTGACGAAACAGAACGAGACGAGTGGAGCTTCTTCTGTTGGAAATGGTAGTGGG
ATGAATAAGAAGGAAACACATCCCCCGGTTAGCGCAGGCTCACTGAAGGATCATTCATCC
CAAACAATCGCCGCAAAAGCTGGGAATCACAGCGAAGTTCTGGCCAAAGGGTCATCAACT
AAGCAGGCTGGTGGTGCCGGTGGAAATAAGAAGGTTGACTGGATAAAGGAGATGGCCGGC
TGTGACATGTTCCATGGGAATTGGGTTCGGGACGACTCGTACCCTCTCTACCCTGGGGGA
TCGTGCCCTCACATCGATGAGCCCTTCGACTGCCATCTCAATGGCCGGCCGGACCGAGGT
TATGAGAAGCTCCGGTGGCAACCCAGTGGATGCAACATCCCAAGATTGAATCCAACCGAC
ATGTTGGAGAGGCTGAGGGGGAAAAGACTAGTTTTTGTTGGCGATTCACTCAACAGGAAC
ATGTGGGAATCCCTGGTTTGTATATTGAGGCATTCTGTCAAGGACAAGAGGAAGGTTTTT
GAGGCTTCTGGTAGGCGCGAGTTTAAGACCGAGGGCTCATACTCTTTCCTGTTCACGGAC
TATAACTGCAGTGTGGAGTTCTTCCGCTCTCCTTTCCTAGTTCAAGAGTGGGAGACGCGA
GTCAGCAATGGAAATAAAAAGGAAACCCTTAGGCTTGACATTGTCGAGCAATCATCACCA
AAGTACAAGGATGCAGACTTCATCATTTTCAATACTGGACACTGGTGGACACATGAAAAA
ACTGCCCTAGGGAAGGACTATTACCAGGAAGGTAGTCACATATATAGTGAGTTAAATGTC
GTGGACGCCTTTCATAAAGCCCTTATCACCTGGTCCAGATGGATTGATGGCAATGTAAAT
CCCAAGAAAACCACCGTGATGTTCAGAGGCTACTCAGCATCTCATTTCAGTGGCGGGCAA
TGGAATTCAGGAGGCAGCTGCGACAAGGAGACCGAGCCAATAAAAAATGAGCAATACCTT
TCAACCTACCCACCAAAGATGAGCATTTTGGAGGATGTGATCCACAAGATGAGAACCCCG
GTTGTTTACTTGAACATAACAAGATTGACCGACTATAGAAAGGATGCGCACCCCTCGATC
TACCGCAAGCAACACCTGAGTGAGGAGGAGAGGAGGTCGCCTGAGAGATACCAGGACTGT
AGCCACTGGTGTCTCCCCGGGGTACCGGATTCCTGGAACGAGCTGGTTTACGCCCAACTT
TTGATCAGTCAGCATCAGATGCTCCAACAGTAA
>TraesCS7A02G167500.1 CDS sequence
ATGAAGGGCCTGTGGAAGCAGAGCGGGCTGGCGGCCATGGCGTGCGCCGACGCGGGCCAG
CTCGGCCCGGCCGGCGCCGGGGCGGGGCGCTCCCGCAGGCGCGCGAGGCTCGTGGTGTAC
GCCCTCGCGGTGGCCTTCGCAGCATTGACGGCCTACATCGCCCTCTGCTCGCCCGCGGCC
CCCGCCGGCGCGGGCGTCGGCGGGGCCGGGGACGGAGCCTCGTGGTTCGACGGCGTGTAC
GCCTCCACGGCGCCGTACCGCTCGCATGTTTCGACCTTCTTCTCCTCCGTCTTCCCTGCC
AACTCGTCCGCCCCCTCGCCCGAGCCGTCTCGCCGCGACGGCGGTGGCGCGGCCAGCGGA
TCGAGCGAGGGAGGCGGCGACGTGAGTCGCGATGTGGATACTAAGCAAGTCGGAAGCGGG
GCAGGGAGCGGTAATTCCGCCACGGCTGGGTCTGACAAGCAGTTGGGGAGCGGAGGTAGT
GCGCCAAGCAGCAATGCCGCCGGTGCCGGTGCACCGCCGGCCGGGAACCCAGCGGGAAGT
GGCACGGCCGCCGCCAAGAGCGATTCTCCGACGAATAATCCTGCCACAAGTGGCGGTGCG
CCGGCTAGTTCGGCAGATCGGAATAAAGGTAACTCTACTGGAGGCGGTTCTAGTAGCCAG
GCAGGGGGTCGTGGTGAATCCCCAACTAGTGATTCTGCCGGAGAAAGAGCCGTGCCGAAG
GCCGACGAGGGGAGTGATGGATCCAGTAAGCAGTCGGGAAGCGGAGCTCCGACCAATAAT
GGCGCCGCTGGAAATGTCAGCGCGGTGAAGGCAGACACCAAGGATTCAGTTGGAGTCTCC
GGCGGTAGTCCTGCCGGAGATGGCAGCGCGGTGAAGTCCGATTCCAAAATTGAGCCTGAT
AACCAGGCAGTGACTGCAAGCGGTGCTCCGAGCAGTGGTTCTGCTGCTGGAAATATCACC
ACAGCCAAGGCTGATGGAAAGGATTCAGTTGGTGCGGTTAACAGTGGCTCGGCCGGAAGT
GAGACAGTTGTGAAATCTGATCTGAATAATGAGTCTGATGGTGCATCAGGGAGTGGAAAT
GTAGATGAAACCCATGAATCAGCACCAAGTGCTACTCCAGTGAAGAGCAATGCCGAAGAG
GGAGGAATTCAGCACGATAAATCGAGTGGGAATGTGGTTTCAACTAGTAATCAGACTGCA
GTGGCCGAGGAGAAAGAAGATGAATCTTCAACCAAGAACCAGACCCTTGTAGCATCTCCA
ATTGTGACCAAACAGAACCAGACGAGTGGACCTTCTTCTGTTGGAAGTGATAGTGCGGTG
AATAAGAAGGAAGCAACTCCCCAGGTTAGTGCAAGTTCACTGAAGGATCATTCATCCCAA
ACAATCGCCGCAAAAGCCGGGAACCACAGCGAAGTTCTGGCCAAAGGGTCATCAACTAAG
CAGGCTGGTGGTGCCGGTGGAAATAAGAAGGTTGACTGGATAAAGGAGATGGCCGGCTGT
GACATGTTCCATGGGAACTGGGTTCGGGACGACTCGTACCCTCTCTACCCCGGGGGATCG
TGTCCTCACATCGACGAGCCCTTCGACTGCCATCTCAATGGTCGGCCGGACCGAGCTTAC
GAGAAGCTCCGGTGGCAACCCAGTGGATGCAACATCCCAAGATTGAATCCAACTGATATG
TTGGAGAGGCTGAGGGGGAAACGACTAGTTTTTGTTGGCGATTCACTCAACAGGAACATG
TGGGAATCCCTGGTTTGTATATTGAGGCATTCTGTCAAGGATACGAGGAAGGTTTTTGAG
GCTTCTGGTAGGCGCGAGTTTAAGACCGAGGGCTCGTACTCTTTCCTATTCACGGACTAT
AACTGCAGTGTGGAGTTCTTCCGCTCTCCTTTCCTAGTCCAAGAGTGGGAGACGCGAGTC
AGCAATGGAAATAAAAAGGAAACTCTTAGGCTTGACATTGTCGAGCAATCATCACCAAAG
TACAAGGATGCGGACTTCATCATTTTCAATACTGGACACTGGTGGACACATGAAAAAACT
GCCCTAGGGAAGGACTATTACCAGGAAGGTAGTCACATATATAGCGAGTTAAATGTCGTG
GACGCCTTTCATAAAGCCCTTATCACCTGGTCCAGATGGATTGATGGCAACGTAAATCCC
AAGAAAACCACCGTGATGTTCAGAGGCTACTCAGCATCTCATTTCAGTGGCGGGCAATGG
AATTCAGGAGGCAGCTGCGACAAGGAGACCGAGCCAATAAAAAATGAGCAATACCTTTCA
ACCTACCCACCAAAGATGAGCATTTTGGAGGATGTGATCCACAAGATGAGAACCCCGGTT
GTTTACTTGAACATAACAAGATTGACGGACTATAGAAAGGATGCGCACCCCTCGATCTAC
CGCAAGCAACACCTGAGCGAGGAGGAGAGGAGGTCGCCTGAGAGATACCAGGACTGCAGC
CACTGGTGTCTCCCCGGGGTACCGGATTCCTGGAACGAGCTGGTTTACGCCCAACTTTTG
ATCAGTCAGCATCAAATGCTCCAACAGTAA
>TraesCS4B02G160600.1 CDS sequence
ATGGCCACCATGGACGTCCTCTCCGCCAAGCTCCTCCGCTCCTCCCTCCACCCGCACGCC
CCATTTCTTCCCTGCCCATCCCTCCCGTCCCGACGCTACCGCCGCCCCTCCTCAATCTAC
TGCCGCCTCACCACCTCCTCCCTCTCGTCCTCCTCCGCCGCCACCACATCCGAGGGGGAC
GCAAACCAGGACCTTTCCGCCCTCCTCTCCGATGAATCCACCACCGACGCGCCCGGCGCC
GGTTCCAGGAAAAAGCGGTCGAACAGCGGCGCGTCGAGCATCCCGTCCGGGGTGCGGCTG
GAGAACATCTCCAAGTCTTACAAGGGAGTGACAGTCCTGAAGGACGTATCCTGGGAAGTG
CAGCGTGGGGAGAAGGTGGGGCTCGTTGGAGTCAACGGCGCCGGCAAGACCACGCAACTC
CGCATCATCGCCGGTCTCGAAGAGCCCGACGGCGGCAACGTCGTCAAGGCCAAGGAGAAC
ATGAAGATCGCCTTCCTCAGCCAGGAGTTCGAAGTCTGCGCCTCCCGGACCGTCAGGGAG
GAGTTTCTCAGCGCCTTCCAGGAGGAGATGGGCGTAAAGACCTGCCTCGACCAGGTGCAG
GCGGCGCTTGAGCGAGCAACCGAGGACATGGACCTCATGGGGAGGCTCCTCGACGAGCTC
GACCTGCTGCAGCGGCAGTCGCAGGACGTCGACCTGGGCATGGTGGATGTCAAGATTCAG
AAGCTCATGCCCGAGCTCGGGTTTGTGCCGGAGGACGCTGACCGCCTTGTCGCATCCTTC
AGCGGAGGCTGGAAGATGAGGATGTCGCTTGGCAAGATACTTCTTCAGGATCCTGATTTG
CTTCTACTTGACGAGCCCACAAATCATGTCGATTTGGACACCATTGAGTGGCTGGAGAGC
TACCTTAAGACCCAGGATGTACCAATGGTCATCATATCTCATGACAGGGCTTTCCTTGAT
CAGTGTTGTACAAAGATAGTGGAGACTGAATTTGGGGTGTCGAAAACGTACAAGGGTAAC
TATTCTGGATATGTTCTTGCAAAAGCGATTTGGGTGGAAACTCAACGTGCTGCATGGGAG
AAGCAGCAGAAGGAGATTGAGCATACAAGGGAACTGATAAGTCGGCTTGGGGCTGGAGCT
AGCTCGGGGCGTGCTTCAAGTGAGCAAAAGAAATTGGAAAAGCTTGAGAAAGAAGGGTTG
ATTGAGAAACCTTTCCAAAGGAAGCAGTTAAAGATCAGGTTTCCTGAACGTGGGAGAAGC
GGTAGAACTGTGTTAGCAATAAATAATCTCAAGTTTGGGTTTGGGGATAAGATATTGTTC
AACAATGCTAATCTAATAGTTGAGAGAGGCGAAAAGATAGCCATTATTGGCCCCAATGGA
TGTGGTAAGAGCACATTACTGAAACTTGCTTTGGGAATGGAGAAGCCACAAGAAGGCGAA
GTCATTCTTGGGGAGCATAATGTCCTGCCCAACTACTTCGAGCAGAATCAGGCAGAAGCT
CTTGATTTAGAGAAGACTGTACTGGACACTGTAGCTGAAGCTGCAGAGGATTGGAAAATT
GATGATATCAAAGGTCTCCTTGGTCGTTGTAACTTTAGGGATGACATGCTGAATAGAAAG
GTTTGGTTTTTAAGTGGTGGAGAGAAGGCAAGGCTTTCCTTTTGCAAGTTCATGGTGACT
CCATCTACTTTACTAATCTTGGATGAACCAACAAATCACCTCGATATTCCATCAAAGGAA
ATGCTTGAGGAGGCAATATCAGAATACATGGGCACTGTAATAACAGTTTCTCATGATCGG
TATTTTGTAAAACAAATAGTTAACAGAGTCATTGAAGTGAAAGATCAAACTATCCAGGAC
TATCAAGGAGATTACAATTATTACCTTGAAAGGAACCTGGAGGCGGGAGAAAGGGAACTT
GCCCGTGCGGAAGAGCTCGAGGAAAAGGCCCCTAAAGTAAAAGCCAAGTCAAAAATGTCA
AAGGCGGAGAAACTTGCAAGGAAGAAACAGAAAGTGCAGGCCTTCCAACAAAGCAAGCAG
AAATCAAAATCAATGAAAAACTCGAAGAGGTGGAACTGA
>TraesCS4D02G149400.1 CDS sequence
ATGGCCACCATGGACGTCCTCTCCGCCAAGCTCCTCCGCTCCTCCCTCCACCCGCACGCC
CCCTGTCTTCCCTGCCCATCCCTCCCGTCCCGACGCTACCGCCGCCCCTCCTCAATCTAC
TGCCGCCTCACCACCTCCTCCCTCCCGTCCTCCTCCGCCGCCACCACGTCCGAGGGGGAC
GCAAACCAGGACCTTACCGCCCTCCTCTCCGATGAATCCACCACCGCCGCGCCCGGCGCC
GGTTCCAGGAAGAAGCGGCCGAACAGCGGCGCGTCGAGCATCCCGTCCGGGGTGCGGCTG
GAGAACATCTCCAAGTCTTACAAGGGAGTGACAGTCCTGAAGGACGTATCCTGGGAAGTG
CAGCGTGGGGAGAAGGTGGGGCTCGTTGGCGTCAACGGCGCCGGCAAGACCACGCAACTC
CGCATCATCGCCGGTCTCGAAGAGCCCGACGGCGGCAACGTCGTCAAGGCCAAGGAGAAC
ATGAAGATCGCCTTCCTCAGCCAGGAGTTCGAAGTCTGCGCCTCCCAGACCGTCAGGGAG
GAGTTTTTCAGCGCCTTCCAGGAGGAGATGGGCGTTAAGACCCGCCTTGACCAGGTGCAG
GCGGCGCTTGAGCGAGCAACCGAGGACATGGACCTCATGGGGAGGCTCCTCGACGAGCTC
GACCTGCTGCAGCGGCAGTCGCAGGACGTCGACCTGGGCATGGTGGATGTCAAGATTCAG
AAGCTCATGCCCGAGCTCGGGTTTGTGCCGGAGGACGCTGACCGCCTTGTCGCATCCTTC
AGCGGAGGCTGGAAGATGAGGATGTCGCTTGGCAAGATACTTCTTCAGGATCCTGATTTG
CTTCTACTTGACGAGCCCACAAATCATGTTGATTTGGACACCATTGAGTGGCTGGAGAGC
TACCTTAAGACCCAGGATGTACCAATGGTCATCATATCTCATGACAGGGCTTTCCTTGAT
CAGTGTTGTACAAAGATAGTGGAGACTGAATTTGGGGTGTCGAAAACATACAAGGGTAAC
TATTCTGGATATGTTCTAGCAAAGGCGATTTGGGTGGAAACTCAACGTGCTGCATGGGAG
AAGCAGCAGAAGGAGATTGAGCATACAAGGGAACTGATAAGTCGGCTTGGGGCTGGAGCT
AGCTCGGGGCGTGCTTCAAGTGAGCAAAAGAAATTGGAAAAGCTTGAGAAAGAAGGGTTG
ATTGAGAAACCTTTCCAAAGGAAGCAGTTAAAGATCAGGTTTCCTGAACGTGGGAGAAGC
GGTAGAACTGTGTTAGCAATACACAATCTCAAGTTTGGGTTTGGGGATAAGATATTGTTC
AACAATGCTAATCTAATAGTTGAGAGAGGCGAAAAGATAGCCATTATTGGCCCCAATGGA
TGTGGTAAGAGCACGTTACTGAAACTTGCTTTGGGAACGGAGAAGCCACAAGAAGGTGAA
GTCATTCTTGGGGAGCATAATGTCCTGCCTAACTACTTCGAGCAGAATCAGGCAGAAGCT
CTTGATTTAGAGAAGACTGTACTGGACACTGTAGCTGAAGCTGCAGAGGATTGGAAAATT
GATGATATCAAAGGTCTCCTTGGTCGTTGTAACTTTAGGGATGACATGCTGAATAGAAAG
GTTCGGTTTTTAAGTGGTGGAGAGAAGGCGAGGCTTTCCTTTTGCAAGTTCATGGTGACT
CCATCTACTTTACTAATCTTGGATGAACCAACAAATCACCTCGATATTCCATCAAAGGAA
ATGCTTGAGGAGGCAATATCAGAATACACGGGCACTGTAATAACAGTTTCTCATGATCGG
TATTTTGTCAAACAAATAGTTAACAGAGTCATTGAAGTGAAAGATCAAACTATCCAGGAC
TATCAAGGAGATTACAATTATTACCTTGAAAGGAACCTGGAGGCGAGAGAAAGGGAACTT
GCCCGTGCGGAAGAGCTCGAGGAAAAGGCCCCCAAAGTAAAAGCCAAGTCAAAAATGTCA
AAGGCGGAGAAACTTGCAAGGAAGAAACAGAAAGTGCAGGCCTTCCAACAAAGCAAGCAG
AAATCAAAATCAATGAAAAACTCGAAGAGGTGGAACTGA
>TraesCS4A02G156300.1 CDS sequence
ATGGCCACCATGGACGTCCTCTCCGCCAAGTTCCTCCGCTCCTGCCTCCACCCGCACGCC
CCCTTTCTTCCCTGCCCATCCCTCCCGTCCCGACGCTACCGCCAGCCCTTCTCAATCTAC
TGCCGCCTCAGCACCTCCTCCCCCTCGTCCTCCTCCGCCGCCACCACATCCGAGGGGGAC
GCAAACCAGGACCTTTCCGCCCTCCTCTCCGATGAATCCACCACCGCCGCGCCCGGCGCC
GGTTCCAGGACGAAGCGGCCGAACAGCGGCGCGTCGAGCATCCCGTCCGGGGTGCGGCTG
GAGAACATCTCCAAGTCTTACAAGGGAGTGACAGTCCTGAAGGACGTATCCTGGGAAGTG
CAGCGTGGGGAGAAGGTGGGGCTCGTTGGCGTCAACGGCGCCGGCAAGACCACGCAACTC
CGCATCATCGCCGGTCTCGAAGAGCCCGACGGCGGCAACGTCGTCAAGGCCAAGGAGAAC
ATGAAGATCGCCTTCCTCAGCCAGGAGTTCGAAGTCTGCGCCTCCCGGACCGTCAGGGAG
GAGTTTCTCAGCGCCTTCCAGGAGGAGATGGGCGTCAAGACCCGCCTCGACCAGGTGCAG
GCGGCGCTTGAGCGAGCAACCGAGGACATGGACCTCATGGGGAGGCTCCTCGACGAGCTC
GACCTGCTGCAGCGGCAATCGCAGGACGTCGACCTGGGCATGGTGGATGTCAAGATTCAG
AAGCTCATGCCCGAGCTCGGGTTTGTGCCGGAGGACGCTGACCGCCTTGTCGCATCCTTC
AGCGGAGGCTGGAAGATGAGGATGTCGCTTGGCAAGATACTTCTTCAGGATCCTGATTTG
CTTCTACTTGACGAGCCCACAAATCATGTCGATTTGGATACCATTGAGTGGCTGGAGAGC
TACCTTAAGATCCAGGATGTACCAATGGTCATCATATCTCATGACAGGGCTTTCCTTGAT
CAGTGTTGTACAAAGATAGTGGAGACTGAATTTGGGGTGTCGAAAATGTACAAGGGTAAC
TATTCTGAATATGTTCTAGCAAAGGCGATTTGGGTGGAAACTCAACGTGCTGCATGGGAG
AAGCAGCAGAAGGAGATTGAACATACAAGGGAACTGATAAGTCGGCTTGGGGCTGGAGCT
AGCTCGGGGCGTGCTTCAAGTGAGCAAAAGAAATTGGAAAAGCTTGAGAAAGAAGGGTTG
ATTGAGAAACCTTTCCAAAGGAAGCAGTTAAAGATCAGGTTTCCTGAACGTGGGAGAAGC
GGTAGAACTGTGTTAGCAATAAATAATCTCAAGTTTGGGTTTGGGGATAAGATATTGTTC
AACAATGCTAATCTAATAGTTGAGAGAGGCGAAAAGATAGCCATTATTGGCCCCAATGGA
TGTGGTAAGAGCACATTACTGAAACTTGCTTTGGGAACGGAGAAGCCACAAGAAGGTGAA
GTCATTCTTGGGGAGCATAATGTCCTGCCTAACTACTTCGAGCAGAATCAGGCAGAAGCT
CTTGATTTAGAGAAGACTGTACTGGACACTGTAGCTGAAGCTGCAGAGGATTGGAAAATT
GATGATATCAAAGGTCTCCTTGGTCGTTGTAACTTTAGGGATGACATGCTGAATAGAAAG
GTTCGGTTTCTAAGTGGTGGAGAGAAGGCGAGGCTTTCCTTTTGCAAGTTCATGGTGACT
CCGTCTACTTTACTAATCTTGGATGAACCGACAAATCACCTCGATATTCCATCAAAGGAA
ATGCTTGAGGAGGCAATATCAGAATACACGGGCACTGTAATTACAGTTTCTCATGATCGG
TATTTTGTAAAACAAATAGTTAACAGAGTCATTGAAGTGAAAGATCAAACTATCCAGGAC
TATCAAGGAGATTACAATTATTACCTTGAAAGGAACCTGGAGGCGAGAGAAAGGGAACTT
GCACGTGCGGAAGAGCTCGAGGAAAAGGCCCCCAAAGTAAAAGCCAAGTCAAAAATGTCA
AAGGCCGAAAAACTTGCAAGGAAGAAACAGAAAGTGCAGGCCTTCCAACAAAGCAAGCAG
AAATCAAAATCAATGAAAAACTCGAAGAGGTGGAACTGA
>TraesCSU02G090500.1 CDS sequence
ATGGCGGCGCTGGTGGAGACGAGCATGGGGGTGGTGCGGGAGGTGCTGGGCGACTCGGTG
GTGGACGAGGTGGACGAGCCCATCGTCTCCTACATCGCCAACGTCCTCGCCGACCAGGAC
TTCGACTTCGGGCCCCCCGACGGCCACGGCATCTTCGACGCCCTCGGCGACCTCCTCATC
GACGCCCGCTGCGTCTACGACCGAGAGCACTGCCTCGANGTCTGCACTAAGCTCTGTGAG
AAGTTGGGGAGCCATGGCATTGTCAAACCTAAGGCAGCCGTGCGGAGCCTCGCCACGCCT
CTGCGCATGAACGCGGGGATGGAGGAGCAGGTCGCTCCCAAGAAGCCAGAGAATATCTTC
GACGCGCCCTTGCTGTCCTCGCGCGACAAGGCCAAGCTCGAACGGAACAAGAGAAAAGAA
GACAGGCAAAGAGAGGCCCAGTACCAAATGCATGTTGCCGAAATGGAGGCGCTCAGGGCT
GGAATGCCTCCAGTTTATGTAAATCACAGTAATGTTGGTGGCACAACCATTAGGGATATC
CATATGGAGAACTTCAGTGTTACTGTTGGAGGTCGTGATCTTATTCAAGATGTCACCTTA
ACGCTCGCTTTTGGAAGGCACTATGGTCTTGTTGGAAGAAATGGTACTGGAAAGACTTCT
CTTCTCAGAGCTATGGCTCAACATGCAATTGATGGAATTCCTAAGAACTGCCAGATATTG
CACGTTGAACAAGAGGTCACGGGTGATGACACAACAGCTTTGCAGTGTGTGCTGAATGCT
GATGTTGAACGGGTCCAACTTATGCAAGAAGAGGCCCAGCTGGGTCAATTACTGAAAGAT
CTAGAGTATGAGGCAGAGTCCAAACAGAGCCTAGACAAGAGCAAGGGTGATGTTGACAAA
GATTCTATCAGCAAGAGGCTTGAGGAGATATACAAGAGACTTGAATTCATTGATGCAGAT
GCAGCAGAAGCTCGTGCGGCATCAATTCTGGCGGGTCTCAGTTTCACTCCAGAAATGCAA
TGCAAAAATACAAAATCATTTTCGGGAGGATGGCGGATGAGAATAGCACTAGCACGTGCT
CTATTCATTGAGCCAGATTTACTGCTACTTGATGAGCCAACAAATCATCTTGATCTGCAT
GCTGTGTTATGGTTAGAAACATATCTCCTGAAGTGGCCAAAGACATTCATTGTTGTGTCC
CATGCTAGAGAGTTTCTGAATACGGTTGTCACCGACGTTCTTCACCTACATGGTAAGAAG
CTACATGCTTACAAAGGTGACTATGACACATTTGAGAGGACAAGGGAGGAGCACCTCAAG
AATCAGATGAAAGCCTTCGAAACAAATGAGAAGGCCAGAGGACACATGCAGGCATTCATT
GACAAGTTCAGATACAATGCAAAGAGAGCATCACTTGTTCAATCAAGAATCAAGGCATTG
GAGCGAATGGAACATGTTGACGCTGTTGTTAGTGACCCAGACTACAAATTCGAATTTCCA
ACTCCAGATGACCGTCCTGGACCACCAATCATTAGCTTCAGTGACGCGTCATTTGGTTAT
CCTGGAGGGCCTATTTTGTTTAAAAACTTGAATTTTGGTATCGACCTCGACAGCCGCATA
GCAATGGTTGGTTCAAACGGTATCGGGAAGTCCACTATACTGAAATTAATATCTGGAGAC
CTGCAGCCAACTTCGGGAACAGTGTTTCGCTCCCCCAAGGTCCGCATGGCTGTATTCAGT
CAGCATCATGTTGATGGACTTGATTTGACGGTGAACCCCCTTTTGTACATGATGAGATGC
TTCCCGGGTGTACCTGAACAGAAACTGAGGTCACATTTGGGTTCCTTCGGTGTTACAGGA
AATCTTGCCCTCCAATCTATGTACACTTTATCAGGTGGTCAGAAGAGTAGGGTTGCGTTT
GCGAAGATCACCTTCAAGAAGCCGCACATCATCCTTCTTGATGAGCCTTCTAACCATCTT
GATCTTGACGCTGTGGAGGCGCTCATCCAGGGGCTGCTCATATTCCAGGGAGGAGTGCTG
ATGGTGAGTCACGACGAGCATCTGATCACGGGGAGTGTGGACGAGCTCTGGGCGGTGACG
GACGGCAAGGTCGCCCCGTTCCCGGGCACGTTCAAGGAGTACAAGAAGATGCTCACGACA
TAA
>TraesCS6A02G409800.1 CDS sequence
ATGGCGGCGCTGGTGGAGACGAGCATGGGGGTGGTGCGGGAGGTGCTGGGCGACTCGGTG
GTGGACGAGGTGGACGAGCCCATCGTCTCCTACATCGCCAACGTCCTCGCCGACCAGGAC
TTCGACTTCGGCCCCCCCGACGGCCACGGCATCTTCGACGCCCTCGGCGACCTCCTCATC
GACGCCCGCTGCGTCTACGACCGCGAGCACTGCCTCGAGGTCTGCACCAAGCTCTGTGAG
AAGTTGGGGAGCCATGGCATCGTCAAACCTAAGGCAGCCGTGCGGAGCCTCGCCACGCCT
CTGCGCATGAACGCGGGGATGGAGGAGCAGGTCGCTCCCAAGAAGCCAGAGAATATCTTC
GACGCGCCCTTGCTGTCCTCGCGAGACAAGGCCAAGCTCGAGCGGAACAAGAGAAAAGAA
GACAGGCAAAGAGAGGCCCAGTACCAAATGCATGTTGCCGAAATGGAGGCGCTCAGGGCT
GGAATGCCTCCGGTTTATGTAAATCACAGTAATGTGGGTGGCACAACCATTAGGGATATC
CATATGGAGAATTTCAGTGTTACCGTTGGAGGTCGTGATCTTATTCAAGATGTCACCTTA
ACGCTCGCTTTTGGAAGGCACTATGGTCTTGTTGGAAGAAATGGTACTGGAAAGACTTCT
CTTCTCAGAGCTATGGCTCAACATGCAATCGACGGAATTCCTAAGAACTGCCAAATATTG
CACGTTGAACAAGAGGTCACGGGTGATGACACAACAGCTTTGCAGTGTGTGCTGAATGCT
GATGTTGAACGGGTCCAGCTTATGCAAGAAGAGGCCCAGCTGGGTCAATTACTGAAAGAT
CTGGAGTATGATGCAGAGTCCAAACAGAGCCTAGACAAGAGCAAGGGTGATGTTGACAAA
GATTCTATCAGCAAGAGGCTTGAGGAGATATACAAGAGACTTGAATTCATTGATGCAGAT
GCAGCAGAAGCTCGTGCAGCATCAATTCTGGCGGGTCTCAGTTTCACTCCAGAAATGCAA
TGCAAAAATACAAAATCATTTTCGGGAGGATGGCGGATGAGAATAGCACTAGCACGTGCT
CTATTCATTGAGCCAGATTTACTGCTACTTGATGAGCCAACAAATCATCTTGATCTGCAT
GCTGTGTTATGGTTAGAAACATATCTCCTGAAGTGGCCAAAGACATTCATTGTTGTGTCC
CACGCTAGAGAGTTTCTGAATACGGTTGTCACCGACGTTCTTCACCTACATGGTAAGAAG
CTACATGCTTACAAAGGTGACTATGACACATTTGAGAGGACAAGGGAGGAGCACCTCAAG
AATCAGATGAAAGCCTTCGAAACAAATGAGAAGGCCAGAGGACACATGCAGGCATTCATT
GACAAGTTCAGATACAATGCAAAGAGAGCATCACTTGTTCAATCAAGAATCAAGGCATTG
GAGCGAATGGAACATGTTGACGCTGTTGTTAGTGACCCAGACTATAAATTCGAATTTCCA
ACTCCAGATGACCGTCCTGGACCACCAATCATTAGCTTCAGTGATGCGTCATTTGGTTAT
CCTGGAGGGCCTATTTTGTTTAAAAACTTGAATTTTGGTATCGACCTCGACAGTCGCATA
GCAATGGTTGGTTCAAACGGTATCGGGAAGTCCACTATACTGAAATTAATATCTGGAGAC
CTGCAGCCAACTTCGGGAACAGTGTTTCGCTCCCCCAAGGTCCGCATGGCTGTATTCAGT
CAGCATCATGTTGATGGACTTGATTTGACGGTGAACCCGCTTTTGTACATGATGAGATGC
TTCCCGGGTGTACCTGAACAGAAACTGAGGTCACATTTGGGTTCCTTCGGTGTTACAGGA
AATCTTGCCCTCCAATCTATGTACACTTTATCAGGTGGTCAGAAGAGTAGGGTCGCGTTC
GCGAAGATCACCTTCAAGAAGCCGCACATTATCCTTCTTGATGAGCCTTCTAACCATCTT
GATCTCGACGCAGTGGAGGCGCTCATCCAGGGTCTGCTCATATTCCAGGGAGGAGTGCTG
ATGGTGAGTCACGACGAGCATCTGATCACGGGGAGTGTGGATGAGCTCTGGGCGGTGACC
GATGGCAAGGTCGCCCCGTTCCCGGGCACGTTCAAGGAGTACAAGAAGATGCTCACGACA
TAA
>TraesCS6B02G456000.1 CDS sequence
ATGGCGGCGCTGGCGGAGACGAGCATGGGGGTGGTGCGGGAGGTGTTGGGCGACTCGGTG
GTGGACGAGGTGGACGAGCCCATCGTCTCCTACATCGCCAACGTCCTCGCCGACCAGGAC
TTCGACTTCGGCCCCCCCGACGGCCACGGCATCTTCCACGCCCTCGGCGACCTCCTCATC
GACGCCCGCTGCGTCTACGACCGCGACCACTGCCTCGAGGTCTGCACTAAGCTCTGCGAG
AAGTTGGGGAGCCATGGCATCGTCAAGCCTAAGGCGGCCGTGCGGAGCCTCGCCACGCCC
CTGCGCATGAACGCGGGGATGGAGGAGCAGGTCGCTCCCAAGAAGCCAGAGAATATCTTC
GACGCGCCCTTGCTGTCCTCGCGCGACAAGGCCAAGCTCGAGCGCAACAAGAGAAAAGAG
GACAGGCAAAGAGAGGCCCAGTACCAAATGCATGTTGCCGAAATGGAGGCGCTCAGGGCT
GGAATGCCCCCAGTTTATGTAAATCACAGTAATGTGGGTGGCACAACCATTAGGGATATC
CATATGGAGAACTTCAGTGTTACTGTTGGAGGTCGTGATCTTATTCAAGATGTCACCTTG
ACGCTCGCTTTTGGAAGGCACTATGGTCTTGTTGGAAGAAATGGTACTGGAAAGACTTCT
CTTCTCAGAGCTATGGCTCAACATGCAATTGATGGAATTCCTAAGAACTGCCAGATATTG
CACGTTGAACAAGAGGTCACGGGTGATGACACTACAGCTTTGCAGTGTGTGCTGAATGCT
GATGTTGAACGGGTCCAGCTTATGCAAGAAGAGGCCCAGCTGGGTCAATTACTGAAAGAT
CTAGAGTATGAGGCAGAGTCCAAACAGAGGGTAGACAAGAGCAAGGGTGATGTTGACAAA
GATTCTATCAGCAAGAGGCTTGAGGAGATATACAAGAGACTTGAATTCATTGATGCAGAT
GCAGCAGAAGCTCGTGCGGCATCAATTCTGGCGGGTCTCAGTTTCACTCCAGAAATGCAA
TGCAAAAATACAAAATCATTTTCGGGAGGATGGCGGATGAGAATAGCACTAGCACGTGCT
CTATTCATTGAGCCAGATTTACTGCTACTTGATGAGCCAACAAATCATCTTGATCTGCAT
GCTGTGTTATGGTTAGAAACATACCTCCTGAAGTGGCCAAAGACATTCATTGTTGTGTCC
CACGCTAGAGAGTTTCTGAATACGGTTGTCACCGACGTTCTTCACCTACATGGTAAGAAG
CTACATGCTTACAAAGGTGACTATGACACATTTGAGAGGACAAGGGAGGAGCACCTCAAG
AATCAGATGAAAGCCTTCGAAACAAATGAGAAGGCCAGAGGACACATGCAGGCATTCATT
GACAAGTTCAGATACAATGCAAAGAGAGCATCACTTGTTCAATCAAGAATCAAGGCATTG
GAGCGAATGGAACATGTTGACGCAGTTGTTAGTGACCCAGACTATAAATTCGAATTTCCA
ACTCCAGATGACCGTCCTGGACCACCAATCATTAGCTTCAGTGACGCATCATTTGGTTAT
CCTGGAGGGCCTATTTTGTTTAAAAACTTGAATTTTGGTATCGACCTCGACAGCCGCATA
GCAATGGTTGGTTCAAACGGTATCGGGAAGTCCACTATACTGAAATTAATATCTGGAGAC
CTGCAGCCAACTTCGGGAACAGTGTTTCGCTCCCCCAAGGTCCGCATGGCTGTATTCAGT
CAGCATCATGTTGATGGACTTGATCTGACGGTGAACCCCCTTCTGTACATGATGAGATGC
TTCCCGGGTGTACCTGAACAGAAACTGAGGTCACATTTGGGTTCCTTCGGTGTTACAGGA
AATCTTGCCCTCCAATCTATGTACACTTTATCAGGTGGTCAGAAGAGTAGGGTCGCGTTT
GCGAAGATCACCTTCAAGAAGCCGCACATTATCCTTCTTGATGAGCCTTCTAACCATCTT
GATCTCGACGCAGTGGAGGCGCTCATCCAGGGTCTGCTCATATTCCAGGGAGGAGTGCTG
ATGGTGAGTCACGACGAGCATCTGATCACGGGGAGTGTGGACGAGCTCTGGGCGGTGACG
GACGGCAAGGTCGCCCCGTTCCCGGGCACGTTCAAGGAGTACAAGAAGATGCTCACGACA
TGA
>TraesCS1D02G409400.1 CDS sequence
ATGAGTCGCAAAAACGCCTCCTCCGCCGCCGGCAAGAAGGAGAAGCCCCCCTCCGTGTCC
GCCATGCTAGCCTCGATGGACAAGCCGGCGCCCAACGCCAGGCCCGCGCCCAAACCCAAG
TCCTCCAAGCCCTCCAAGGCGCCCCCCTCGTCCTCCTACATGGGCGACATCGACCTGCCC
CCGTCCGACGAGGAGGAGGACGAGGCCGACGTCGCCGCCGTCACCGCCAAGGCCAAGGCC
AAGCCGGCCCGCGCCACCGTCGACCTCAACGCCCTCGCGCCCTCCGACAAGGACGCCAAG
AAGAAGGACAAGCGCGAGATGATGGCGGCGGCCGCCGCCGAGGCCGCCAAGCGGGAGGCG
CTCCGCGACGACCGCGACGCCTTCTCCGTCGTCATCGGCGCCCGCGTCCCCGGATCCGCC
GCCGACGGCGACGCCGCCGTCGACGGCAACATCAAGGACATCGTGCTCGACAACTTCTCC
GTCTCCGCCCGTGGGAAGGAGCTGCTCAAGGGCGCCTCGCTCCGGATCTCGCACGGTCGC
CGGTATGGTCTCGTGGGGCCCAATGGCATGGGCAAATCTACCCTCCTGAAGCTGCTCTCC
TGGCGGCAGGTGCCCGTGCCCAAGAACATCGACGTCCTGCTTGTGGAGCAGGAGATTGTC
GGTGATGACCGCTCGGCGACCGAGGCCGTGGTTGCAGCCAACGAAGAGCTCACGGCGCTC
CGGGCTGAGCAGGCGAAGCTTGAAGCCTCCAACGATCCTGATGACAATGAGAAGCTTGCG
GAGGTGTACGAGAAGCTCAATCTGTGTGACTCGGATGCTGCTCGTGCCCGCGCGTCCAAG
ATCCTCGCGGGGCTGGGGTTTGATCAGGCGATGCAGGCAAGGTCCACAAAGTCATTCAGC
GGTGGCTGGAGGATGCGCATCTCGCTTGCCCGTGCTCTCTTCATGCAGCCAACGTTGCTG
CTCCTTGATGAGCCTACCAACCATTTGGACCTCCGAGCTGTGCTTTGGTTGGAGCAGTAC
CTGTGCTCGCAGTGGAAGAAGACCCTGATTGTAGTCTCCCATGACCGGGACTTCTTGAAC
ACAGTGTGCAATGATATCATACATCTGCATGATAAGAGTCTGCATGTTTACCGCGGCAAT
TTTGATGACTTTGAGAGTGGGTATGAGCAGAAGAGGAAGGAGATGAACAAGAAGTTTGAG
CTGTATGAAAAGCAGATGAAAGCAGCAAGGAAGACTGGGAGCAAGGCTGCACAAGATAAG
GTTAAAGGCCAAGCACTGTCAAAGGCCCATAAAGAAGTTGCCAAGGGGAAGGGCAAGGGA
AAGAATGTGGCAACTGATGATGATAATGTGAAGCCAGCGGATCTGCCACAGAAGTGGCTT
GACTATAAAGTTGAGTTCCACTTCCCAGAGCCTACTTTGCTTACACCACCCCTCCTTCAG
CTCATTGAGGTGGGTTTCAGCTACCCCAACAGGCCGGACTTCAAGTTATCAGATGTTGAT
GTTGGCATTGACATGGGAACACGTGTTGCCATTGTTGGGCCCAATGGGGCAGGAAAGTCT
ACTCTTCTAAATTTACTTGCTGGTGATCTTACCCCAGCTGAAGGAGAGGCAAGAAGGAGC
CAGAAGCTCAGGATTGGACGATACTCGCAGCATTTTGTTGACTTGTTGACAATGGAGGAA
AATGCGGTTCAGTATTTGCTCAGGCTCCACCCAGACCAGGAGGGAATGAGCAAAGCGGAG
GCTGTCCGTGCCAAGCTTGGAAAATTTGGCTTGCCAGGTCACAACCATCTTACTCCCATT
GTTAAATTATCTGGTGGTCAGAAGGCCCGTGTTGTGTTCACTTCGATATCAATGTCGCAT
CCTCACATTCTCCTACTGGATGAGCCTACAAATCACTTGGACATGCAAAGTATTGATGCT
TTGGCAGATGCTCTCGATGAGTTCACTGGAGGTGTGGTCTTGGTTAGCCATGACTCGCGG
TTGATATCTCGAGTTTGTGCCGATGAGCAGAAGAGCCAGATATGGGTTGTGGAGGATGGC
ACAGTGAGTAAATATGATGGCTCGTTTGAGGATTACAAGGATGAACTAATGGCAGAAATA
AAGAAGGAAGTCGAAGAGTAA
>TraesCS3D02G349700.1 CDS sequence
ATGAGTCGCAAAAACGCCTCCTCGTCCACCTCAGCCGCCGCCACGAGCCGCAAGAACGCC
CCCTCGTCCTCCTCGGCCGCGGGCGCCGCCAGCAAGAAGGAAAAACCTCTCTCCGTGTCG
GCCATGCTAGCCTCGATGGACGGCACGGCGCCCAAATCCAAGCCCGCCAAGGCGGCGCCC
AAGCCCAAGCCCTCCAAGGCGCCCGCGTCGTCGTACATGGGCGGCATCGACCTGCCCCCG
TCGGACGACGAGGAGGACGAGGCCGACGTCGCCGCCGTCGCCGCCAAGCCCAAGCCGTCT
CGCGCCACCGTCGACCTCAACGCCCTCGCGCCCTCGGACAAGGACTCGAAGAAGAAGGAG
AAGCGCGAGATGATGGCGGCGGCCGTCGCCGAGGCTGCCAAGCGGGAGGCGCTCCGCGAC
GACCGCGACGCCTTCTCCGTCGTCATCGGAGCGCGCGTCCCCGGATCCGCTGCCGAGGGC
GATGCCGCCGATGGAAACATCAAGGACATCGTGCTCGACAACTTCTCTGTCTCTGCGCGA
GGAAAGGAGCTACTCAAGGGCGCCTCCCTCCGGATCTCGCATGGTCGCCGCTACGGTCTC
GTGGGGCCCAATGGCATGGGCAAATCTACCCTCCTGAAGCTGCTCTCTTGGCGGCAGGTG
CCCGTGCCCAAGAACATTGATGTCCTGCTTGTGGAGCAGGAGATTGTTGGTGATGACCGC
TCGGCAACCGAGGCGGTGGTTGCAGCCAATGAGGAGCTTACGGCGCTCCGGGCTGAGCAG
GCAAAGCTTGAGGCCTCTGATGATCCCGATGACAACGAGAAGCTTGCCGAGGTATACGAG
AAGCTAAATCTATGCGATTCTGATGCTGCACGAGCGCGTGCGTCCAAAATCCTTGCGGGG
CTGGGGTTTGATCAGGCAATGCAGGCAAGGTCCACAAAGTCCTTCAGTGGTGGCTGGAGG
ATGCGCATCTCGCTTGCCCGTGCTCTCTTCATGCAGCCAACATTGCTGCTCCTTGATGAG
CCTACCAACCATTTGGACCTCCGAGCTGTGCTTTGGTTGGAGCAGTACTTGTGCTCACAG
TGGAAGAAGACCCTAATTGTGGTTTCCCATGACCGGGACTTCTTGAACACAGTGTGCAAT
GATATCATTCATTTGCACGATAAGAGTCTGCATGTTTACCGTGGTAATTTTGATGACTTT
GAGAGCGGGTATGAGCAGAAGAGGAAGGAGATGAACAAGAAGTTTGAGGTGTATGAAAAG
CAGATGAAAGCAGCAAGGAAGACTGGGAGCAAGGCTGCACAAGATAAGGTTAAAGACCAA
GCAATGTCAAAGGCCCACAAAGAAGTTGCCAAGGGGAAGGGGAAGGGAAAGAATGTGGCA
ACTGATGATGATAACGTGAAGCCAGCGGATCTGCCACAAAAGTGGCATGACTACAAAGTT
GAGTTCCACTTCCCAGAACCCACTTTGCTCACACCACCACTCCTTCAGCTCATTGATGTG
GGTTTTGGCTACCCCAACCGTCCGGACTTCAAGTTATCAGATGTTGATGTTGGCATTGAC
ATGGGAACACGTGTTGCCATTGTTGGGCCAAATGGAGCAGGAAAGTCTACTATTCTAAAT
TTACTTGCTGGTGATCTTAACCCATCCGAAGGAGAGGCAAGAAGGAGCCAGAAGCTGAGG
ATTGGACGATACTCGCAGCATTTTGTTGACTTGTTGACGATGGAGGAAAATGCAGTTCAG
TATTTGCTCAGGCTCCACCCAGACCAGGGGGGAATGAGCAAAGCGGAGGCTGTCCGTGGC
AAGCTTGGAAAATTTGGCTTGCCAGGTCACAACCATCTTACTCCCATTGTTAAATTATCT
GGTGGTCAGAAGGCCCGTGTTGTGTTCACTTCGATATCAATGTCGAATCCTCACATTCTC
CTACTGGATGAGCCTACAAATCACTTGGATATGCAAAGTATTGATGCTTTGGCAGACGCT
CTGGATGAATTCACTGGAGGTGTGGTCTTGGTTAGCCATGACTCACGGTTGATATCTCGA
GTTTGTGACGATGAGGAGAAGAGCCAGATATGGGTTGTGGAGGATGGCACGGTGACTAAA
TATGATGGCTCGTTTGAGGATTACAAGGATGAACTAATGGCAGAAATAAAGAAGGAAGTC
GAAGAGTAA
>TraesCS3B02G388600.1 CDS sequence
ATGAGTCGCAAAAACGCCTCCTCGTCCACCTCAGCCGCCGCCACGAGCCGCAAAAACGCC
CCCTCGTCCTCCTCGGCCGCGGGCGCCGCCGGCAAGAAGGAAAAACCCCTCTCCGTGTCG
GCTATGCTAGCCTCGATGGACGGCACGGCGCCCAAATCCAAGCCCGCCAAGGCGGCGCCC
AAGCCCAAGCCCTCCAAGGCGCCCGCGTCGTCGTACATGGGCGGGATCGACCTGCCCCCA
TCGGACGACGAGGAGGACGAGGCCGACGTCGTGGCTGTCGCCGCCAAGCCCAAGCCGTCT
CGCGCCACTGTCGACCTCAACGCCCTCGCGCCCTCGGACAAGGACTCGAAGAAGAAGGAA
AAGCGCGAGATGATGGCGGCGGCCGTCGCCGAGGCTGCCAAGCGGGAGGCGCTCCGCGAC
GACCGCGACGCCTTCTCCGTCGTCATCGGAGCGCGCGTCCCCGGATCCGCCGCCGACGGC
GATGCCGCCGATGGAAACATCAAGGACATCGTGCTCGACAACTTCTCTGTCTCTGCGCGA
GGAAAGGAGCTGCTCAAGGGCGCCTCCCTCCGGATCTCGCATGGTCGCCGCTACGGTCTC
GTGGGGCCCAATGGCATGGGCAAATCCACCCTCCTGAAGCTGCTCTCTTGGCGGCAGGTG
CCTGTGCCCAAGAACATTGATGTCCTGCTTGTGGAGCAGGAGATTGTTGGTGATGACCGC
TCGGCAACTGAGGCAGTGGTTGCAGCCAATGAGGAGCTCACAGCGCTCCGGGCTGAGCAG
GCAAAGCTTGAGGCCTCTAACGACCCCGATGACAACGACAAGCTTGCCGAGGTATACGAG
AAGCTAAATCTATGCGACTCTGATGCTGCACGAGCGCGTGCATCCAAAATCCTTGCGGGG
CTGGGGTTTGATCAGGCGATGCAGGCAAGGTCCACAAAGTCCTTCAGTGGTGGCTGGAGG
ATGCGCATCTCGCTTGCCCGTGCTCTCTTCATGCAGCCAACATTGCTGCTCCTTGATGAG
CCTACCAACCATTTGGACCTCCGAGCTGTGCTTTGGTTGGAGCAGTACCTGTGCTCGCAG
TGGAAGAAGACCCTTATTGTGGTTTCCCATGACCGGGACTTCTTGAACACAGTGTGCAAT
GATATCATTCATTTGCACGATAAGAGTCTGCATGTTTACCGTGGTAATTTTGATGACTTC
GAGAGCGGGTATGAGCAGAAGAGGAAGGAGATGAACAAGAAGTATGAGGTGTACGAAAAG
CAGATGAAAGCAGCAAGGAAGACTGGGAGCAAGGCTGCACAAGATAAGGTTAAAGACCAA
GCAATGTCAAAGGCCCATAAAGAAGTTGCCAAGGGGAAGGGGAAAGGAAAGAATGTGGCA
AATGATGATGATAACGTGAAGCCAGCGGATCTGCCACAAAAGTGGCATGACTACAAAGTC
GAGTTCCACTTCCCAGAACCCACTCTGCTCACACCACCACTCCTTCAGCTCATTGATGTG
GGTTTCGGCTACCCCAACCGTCCGGACTTCAAGTTGTCAGATGTTGATGTTGGCATTGAC
ATGGGAACACGTGTTGCCATTGTTGGGCCCAATGGAGCAGGAAAGTCTACTATTCTAAAT
TTACTTGCTGGTGATCTTAACCCATCCGAAGGAGAGGCAAGAAGGAGCCAGAAGCTGAGG
ATTGGACGATACTCTCAGCATTTTGTTGACTTGTTAACGATGGAGGAAAATGCAGTTCAG
TATTTGCTCAGGCTCCACCCTGACCAGGGGGGAATGAGCAAAGCGGAGGCTGTCCGTGGC
AAGCTTGGAAAATTTGGCTTGCCAGGTCACAACCATCTTACTCCCATTGTTAAATTATCT
GGTGGTCAGAAGGCCCGTGTTGTGTTCACTTCGATATCAATGTTGAATCCTCACATTCTC
CTACTGGACGAGCCTACAAATCACTTGGATATGCAAAGTATAGATGCTTTGGCAGACGCT
CTGGATGAATTCACTGGAGGTGTGGTCTTGGTTAGCCATGACTCGAGGTTGATATCTCGA
GTTTGTGACGATGAAGAGAAGAGCCAGATATGGGTTGTGGAGGATGGCACGGTGACTAAA
TATGATGGCTCGTTTGAGGATTACAAGGATGAACTAATGGCAGAAATTAAGAAGGAAGTA
GAAGAGTAA
>TraesCS1B02G430800.1 CDS sequence
ATGAGTCGCAAAAACGCCTCCTCCGCCGCCGGCAAGAAGGACAAGCCCCTCTCCGTGTCC
GCCATGCTAGCCTCGATGGACAAGCCGGCGCCCAACGCCAGGCCGGCGCCGAAACCCAAG
TCCTCCAAGCCCTCCAAGGCGCCCCCCTCGTCCTCCTCCTACATGGGCGACATCGACCTG
CCCCCGTCCGACGAGGAGGAGGACGAGGCCGACGTCGCCGCCGTCACCGCCAAGGCCAAG
GCCAAGGCCAAGCCGGCCCGCGCCGCCGTCGACCTCAACGCCCTCGCGCCCTCCGACAAG
GACGCCAAGAAGAAGGACAAGCGCGAGATGATGGCGGCGGCGGCCGCCGAGGCCGCCAAG
CGGGAGGCGCTCCGCGACGACCGCGACGCCTTCTCCGTCGTCATCGGCGCCCGCGTCCCC
GGATCCGCCGCCGACGGCGACGCCGCCGCCGTCGACGGGAACATCAAGGACATCGTGCTC
GACAACTTCTCCGTCTCCGCGCGTGGGAAGGAGCTGCTCAAGGGCGCCTCGCTCCGGATC
TCGCACGGTCGCCGCTATGGTCTCGTGGGGCCCAACGGCATGGGCAAATCTACCCTCCTG
AAGCTGCTCTCCTGGCGGCAGGTGCCCGTACCCAAGAACATCGATGTCCTGCTTGTGGAG
CAGGAGATTGTCGGTGATGACCGCTCGGCGACCGATGCCGTGGTCGCGGCCAACGAGGAG
CTCACGGCGCTCCGGGCTGAGCAGGCGAAGCTTGAGGCCTCCAACGATCCTGATGACAGC
GAGAAGCTCGCCGAGGTGTACGAGAAGCTCAACCTGTGTGACTCGGATGCTGCTCGTGCC
CGCGCGTCCAAGATCCTCGCGGGGCTGGGGTTTGATCAGGCGATGCAGGCAAGGTCCACA
AAGTCATTCAGCGGTGGCTGGAGGATGCGCATCTCGCTTGCCCGTGCTCTCTTCATGCAG
CCAACGTTGCTGCTCCTTGATGAGCCTACCAACCATTTGGACCTCCGAGCTGTGCTTTGG
TTGGAGCAGTACCTGTGCTCGCAGTGGAAGAAGACCCTAATTGTAGTCTCCCATGACCGC
GACTTCTTGAACACGGTGTGCAATGATATCATACATTTGCACGATAAGAGTCTGCATGTT
TACCGTGGTAATTTTGATGACTTTGAGAGTGGGTATGAGCAGAAGAGGAAGGAGATGAAC
AAGAAGTTTGAGGTGTACGAAAAGCAGATGAAAGCAGCAAGGAAGACTGGGAGCAAGGCT
GCACAAGATAAGGTTAAAGGCCAAGCACTGTCAAAGGCCCATAAAGAAGTTGCCAAGGGG
AAGGGCAAGGGAAAGAATGTGGCAACTGATGATGATAATGTGAAGCCAGCGGATCTGCCA
CAGAAGTGGCTTGACTATAAAGTTGAGTTCCACTTCCCAGAGCCTACTTTGCTTACACCA
CCCCTCCTTCAGCTCATTGAGGTGGGTTTCAGCTACCCCAACAGGCCAGACTTCAAGTTA
TCTGATGTTGATGTTGGCATTGACATGGGAACACGTGTTGCCATTGTTGGCCCCAATGGG
GCAGGAAAGTCTACTCTTCTAAATTTACTTGCTGGTGATCTTACCCCAGCTGAAGGAGAG
GCAAGAAGGAGCCAGAAGCTCAGGATTGGACGATACTCGCAGCATTTTGTTGACTTGTTG
ACGATGGAAGAAAATGCGGTTCAGTATCTGCTCAGGCTCCACCCAGACCAGGAGGGAATG
AGCAAAGCGGAGGCTGTCCGTGCCAGGCTTGGAAAATTTGGCTTGCCAGGCCACAACCAT
CTTACTCCCATTGTTAAATTATCTGGTGGTCAGAAGGCCCGTGTTGTGTTCACCTCGATA
TCAATGTCGCATCCTCACATTCTCCTACTGGATGAGCCTACAAATCACCTGGACATGCAA
AGTATTGATGCTTTGGCAGATGCTCTGGATGAGTTCACTGGAGGTGTGGTCTTGGTTAGC
CATGACTCGCGGTTGATATCTCGAGTTTGTGCCGATGAGCAGATTAGCCAGATATGGGTT
GTGGAGGATGGCACAGTGAGTAAATATGATGGCTCGTTTGAGGATTACAAGGATGAACTA
ATGGCAGAAATAAAGAAGGAAGTCGAAGAGTAA
>TraesCS3A02G355700.1 CDS sequence
ATGAGTCGCAAAAACGCCTCCTCGTCCTCCTCAGCCGCCGCCACGAGCCGCAAGAACGCC
CCCTCGTCCTCCTCGGCCGCGGGCGCCGCCGGCAAGAAGGAGAAACCCCTCTCCGTGTCG
GCCATGCTAGCCTCGATGGACGGCACGGCGCCCAAATCCAAGCCCGCCAAGGCGGCGCCC
AAGCCCAAGCCCTCCAAGGCGCCCGCGTCGTCGTACATGGGCGGCATCGACCTGCCCCCG
TCGGACGACGAGGAGGACGAGGCCGACGTCGCCGCCGTCGCCGCCAAGCCCAAGCCGGCT
CGCGCCACCGTCGACCTCAACGCCCTCGCGCCCTCGGACAAGGACTCGAAGAAGAAGGAG
AAGCGCGAGATGATGGCAGCCGCCGTCGCCGAGGCTGCCAAGCGGGAGGCGCTCCGCGAC
GACCGCGACGCCTTCTCCGTCGTCATCGGAGCGCGCGTCCCCGGATCCGCCGCTGAGGGC
GATGCCGCCGATGGAAACATCAAGGACATCGTGCTCGACAACTTCTCTGTCTCTGCGCGA
GGAAAGGAGCTACTCAAGGGCGCCTCCCTCCGGATCTCGCATGGTCGCCGCTATGGTCTA
GTGGGGCCCAATGGCATGGGCAAGTCTACCCTCCTGAAGCTGCTCTCCTGGCGGCAGGTG
CCTGTGCCCAAGAACATTGATGTCCTGCTTGTGGAGCAGGAGATTGTTGGTGATGACCGC
TCGGCAACCGAGGCGGTGGTTGCAGCCAATGAGGAGCTCACGGCGCTCCGGGCTGAGCAG
GCAAAGCTTGAGGCCTCTAACGACCCCGATGACAATGACAAGCTTGCCGAGGTATATGAG
AAGCTAAATCTATGTGACTCTGATGCTGCACGCGCTCGTGCGTCCAAAATCCTCGCGGGG
CTGGGGTTTGATCAGGCAATGCAGGCAAGGTCCACAAAGTCCTTCAGTGGTGGCTGGAGG
ATGCGCATCTCGCTTGCCCGTGCTCTCTTCATGCAGCCAACATTGCTGCTCCTTGATGAG
CCTACCAACCATTTGGACCTCCGAGCTGTGCTTTGGTTGGAGCAGTACTTGTGCTCGCAG
TGGAAGAAGACCCTTATTGTTGTCTCCCATGACCGGGACTTCTTGAACACAGTGTGCAAT
GATATCATTCATTTGCACGATAAGAGTTTGCATGTTTACCGTGGTAATTTTGATGACTTT
GAGAGCGGGTATGAGCAGAAGAGGAAGGAGATGAACAAGAAGTTTGAGGTGTATGAAAAG
CAAATGAAAGCAGCAAGGAAGACTGGGAGCAAGGCTGCACAAGATAAGGTTAAAGACCAA
GCAATGTCAAAGGCCCATAAAGAAGTTGCCAAGGGGAAGGGGAAGGGAAAGAATGTGGCA
AATGATGATGATAACGTGAAGCCAGCAGATCTGCCACAAAAGTGGCATGACTACAAAGTT
GAGTTCCACTTCCCAGAACCCACTTTGCTCACACCACCACTCCTTCAGCTCATTGATGTG
GGTTTCGGCTACCCCAACCGTCCGGACTTCAAGTTATCAGATGTTGATGTTGGCATTGAC
ATGGGAACACGTGTTGCCATTGTTGGGCCCAATGGAGCAGGAAAGTCTACTATTCTAAAT
TTACTTGCTGGTGATCTTAACCCATCCGAAGGAGAGGCAAGAAGGAGCCAGAAGCTGAGG
ATTGGACGATACTCGCAGCATTTTGTTGACTTGTTGACGATGGAGGAAAATGCAGTTCAG
TATTTGCTCAGGCTCCACCCAGACCAGGGAGGAATGAGCAAAGCAGAGGCTGTCCGTGGC
AAGCTTGGAAAATTTGGCTTGCCAGGTCACAACCATCTTACTCCCATTGTTAAATTATCT
GGTGGTCAGAAGGCCCGTGTTGTGTTCACTTCGATATCAATGTCGAATCCTCACATTCTC
CTACTGGATGAGCCTACAAATCACTTGGATATGCAAAGTATTGATGCTTTGGCAGACGCT
CTGGATGAATTCACTGGAGGTGTGGTCTTGGTTAGCCATGACTCGCGGTTGATATCTCGA
GTTTGTGACGATGAGGAGAAGAGCCAGATATGGGTTGTGGAGGATGGCACGGTGACTAAA
TATGATGGCTCGTTTGAGGATTACAAGGATGAACTAATGGCAGAGATAAAGAAGGAAGTT
GAAGAGTAA
>TraesCS7D02G054900.1 CDS sequence
ATGATGGCGGCGGCCGTCGCCGAGGCTGCCAAGCGGGAGGCGCTCCGCGGCGCCTTCTCC
GTCGTCATAGGAGCGCGCGTCCCCGGATCCGCCGCTGAGGGCGACGTAGCCGATGGAAAC
ATCAAGGACATCGTGCTCGACAACTTCTCTGTCTCTGTGCGAGGAAACGAGCTGCTCAAG
GGCGCCTCCCTCCGGATCTCGCATGGTCGCCGCTACGGCCTCGTGGGGCCCAATGGCATG
GGCAAATCTACCCTCCTGAAGCTGCTCTCTTGGCGGCAGGTGCCTGTGCCCAAGAACATT
GATGTCCTGCTTGTGGAGCAGCAGATTGTTGGTGATGACCGCTCGGCAACCGAGGCGGTG
GTTGCAGCCAATGAGGAGCTCACGGCGCTCCGGGCTGAGCAGGCAAAGCTTGAGGCCTCT
AACGACCCCGATGACAACGACAAGCTTGCCGAGGTATACGAGAAGCTAAATCTATGCGAC
TCTGATGCTGCACGCGCGGGTGCGTCCAAAATCCTCGCGGGGCTGGGGTTTGATCAGGCG
ATGCAGGCAAGGTCCACAAAGTCCTTCAGTGGTGGCTGGAGGATGCGCATCTCGCTTGAC
CGTGCTCTCTTCATGCAGCCAACATTGCAGCTCCTTGATGAGCCTACCAACCATTTGGAC
CTCCGAGCTGTGCTTTGGTTAGAGCAGTACTTGTGCTCGCAGTGGAAGAAGACCCTTATT
TTGAGTCTGCATGTTTACCGTGGTAATTTTGATGACTTCGAGAGCGGGTATGAGCAGAAG
AGGAAGGAGATGAACAAGAAGTTTGAGGTGTATGAAAAGCAGATGAAAGCAGCAAGGAAG
ACTGGGAGCAAGGCTGCACAAGATAAGGTTAAAGACCAAGCAATGTCAAAGGCCCATAAA
GAAGTTGCCAAGGGGAAGGGGAAGGGAAAGAATGTGGCAAGTGATGATGATAACGTGAAG
CTAGCGGATCTGCCACAAAAGTGGCATGACTACAAAGTTGAGTTCCACTTCCCAGAACCC
ACTTTGCTCACACCACCACTCCTTCAGCTCATTGATGTGGGTTTCGGCTACCCCAACCGT
CCAGACTTCAAGTTATCAGATGTTGATGTTGGCATTGACATGGGAACACGTGTTGCCATT
GTTGGGCCCAATGGAGCAGGAAAGTCTACTATTCTGAATTTACTTGCTGGTGGTCTTAAC
CCATCCGAAAGAGAGGCAAGAAGGAGCCAGAAGCTGAGGATTGGACGATACTCACAGCAT
TTTGTTGACTTGTTGACGATGGAGGAAAATGCAGTTCAGTATTTGCTCAGGCTCCACCCA
GACCAGGGGGGAATGAGCAAAGCGGAGGTTGTCCGTGGCAACCTTGGAAAATTTGGCTTG
CCAGGTCACAACCATCTTACTCCCATTGTTAAATTATGTGGTGGTCAGAAGGCCCGTGTT
CCTACAAATCACTTGGATATGCAAAGTATTGATGCTTTGGCAGACGCTCTGGATGAATTC
ACTGGAGGTCTGGTCTTGGTTAGCCATGACTCGCGGTTGATATCTCGAGTTTGTGACGAT
GAGGAGAAGATCCAGATATGGGTTGTGGAGGATGGCACGGTGACTAAATATGATGGCTCG
TTTGAGGATTACAAGGATGAACTAATGGCAGAAATAAAGAAGGAAGTTGAAGAGTAA
>Os11t0603200.01
MAAPPMELLSSKLLRSSLRLPPSPSLPSPSSRRLRRHAPIHCRLTSSTTTTTTQEEQSAA
DDLSSLLSTSTSDEPSSSKKKRSNSSSGASSIPTGVRLEGIAKSYKGVTVLRDVSWEVQR
GEKVGLVGVNGAGKTTQLRIIAGLEDPDAGAVVKAKDNMRIAFLSQEFEVCASRTVREEF
LAAFEEEMEVRSRLEKVQAALEGATEDMDLMGRLLDELDLLQRRSQDVDLGMVEVKIQKL
MPELGFAPEDADRLVASFSGGWQMRMSLGKILLQDPDLLLLDEPTNHVDLDTIEWLESYL
KTQEVPMVIISHDRAFLDQLCTKIVETEFGVSKTYKGNYSEYVLAKAIWVETQYAAWEKQ
QKEIEQTKELINRLGAGVNAGRASSEQKKLEKLEKEGLIEKPFQRKQLKIRFPERGQSGR
TVLTIRNLEFGFGEEKLFNNANLIVERGEKIAIIGPNGCGKSTLLKLILGMEKTQGGEVL
LGEHNVLPNYFEQNQAEALDLEKTVLDTVAEAAEDWKIDDIKGLLGRCNFRDDMLDRKVQ
FLSGGEKARLAFCKFLVTPSTLLILDEPTNHLDIPSKEMLEEAISEYTGTVITVSHDRYF
VKQIVNRVIEVKDQTIQDYQGDYNYYLERNLEARERELAREEELEEKAPKVKAKSKMSKA
EKIARKKQKMQAFQQSKQKSKSLKNAKRWK
>Os02t0826500.03
VSHAREFLNTVVTDILHLHGQKLHAYKGDYDTFERTREEHLKNQQKAFETNEKARSHMQA
FIDKFRYNAKRASLVQSRIKALERMEHVDAVVSDPDYKFEFPTPDDRPGPPIISFSDASF
GYPGGPTLFKNLNFGIDLDSRIAMVGPNGIGKSTILKLISGDLQPTSGTVFRSPKVRMAV
FNQHHVDGLDLTVNPLLYMMRCYPGVPEQKLRAHLGSFGVTGNLALQPMYTLSGGQKSRV
AFAKITFKKPHIILLDEPSNHLDLDAVEALIQGLLVFQGGVLMVSHDEHLITGSVDELWV
VSEGRVSPFAGTFKDYKKMLKS
>Os03t0441500.02
ALEAVVAADEELAALRAEQAKLEASNDADDNERLAEVYEKLNLRDSDAARARASKILAGL
GFDQAMQARSTKSFSGGWRMRISLARALFMQPTLLLLDEPTNHLDLRAVLWLEQYLCSQW
KKTLIVVSHDRDFLNTVCNEIIHLHDKNLHVYRGNFDDFESGYEQKRKEMNRKFEVFEKQ
MKAAKKTGSKAAQDKVKGQALSKANKEAAKSKGKGKNVANDDDDMKPADLPQKWLDYKVE
FHFPEPTLLTPPLLQLIEVGFSYPNRPDFKLSGVDVGIDMGTRVAIVGPNGAGKSTLLNL
LAGDLTPTKGEVRRSQKLRIGRYSQHFVDLLTMEENAVQYLLRLHPDQEGMSKAEAVRAK
LGKFGLPGHNHLTPIVKLSGGQKARVVFTSISMSHPHILLLDEPTNHLDMQSIDALADAL
DEFTGGVVLVSHDSRLISRVCDDEQRSEIWVVEDGTVNKFDGTFEDYKDELLEEIKKEVE
E
>Os02t0826500.02
QEEAHLVQRQKDLEYEAEFEQSASKSKDGLDKDAISKRLEEIYKRLEFIDADAAEARAAS
ILAGLSFTPEMQRKRTKQFSGGWRMRIALARALFIEPDLLLLDEPTNHLDLHAVLWLETY
LLKWPKTFIVVSHAREFLNTVVTDILHLHGQKLHAYKGDYDTFERTREEHLKNQQKAFET
NEKARSHMQAFIDKFRYNAKRASLVQSRIKALERMEHVDAVVSDPDYKFEFPTPDDRPGP
PIISFSDASFGYPGGPTLFKNLNFGIDLDSRIAMVGPNGIGKSTILKLISGDLQPTSGTV
FRSPKVRMAVFNQHHVDGLDLTVNPLLYMMRCYPGVPEQKLRAHLGSFGVTGNLALQPMY
TLSGGQKSRVAFAKITFKKPHIILLDEPSNHLDLDAVEALIQGLLVFQGGVLMVSHDEHL
ITGSVDELWVVSEGRVSPFAGTFKDYKKMLKS
>Os04t0508000.01
MAGAWRKAWLSMLDRGGGSGAGGGGGGSSGSLHVHLHGLLSPSSSSSSLNGYKRGGGKHG
GGGGCGGGHVMTSSKAVLACFSVALVVAFFYVSVASGPTADAASFPSPTGASSSSLLSWL
SSNSTSAAALPRRSLPPHPPIPPAGGGADLRNTARRTQSGAEGSGLPAPAAEQTAKPRVS
DLRSGAGNATVGDVDGDQRVGNGTRSRQQREETATPMPRWQRRDEEKNSTHHAIVAAPGN
STDAPAPPLNSTATPRAAAAAAATPSTPPERKADTHHSHRRGIRHKQQQHHQHPRRRKDT
VLLAAAAARQEAPDRRDDGAAMPLPAATIINTSTVGDNRVVWTSGVQSGLVSFAKCDVFS
GRWVRDDDEGGGAYPFYPPGSCPHIDDDFNCHKNGRADTGFLRWRWQPHGCDIPRLNPID
FLERLRGQRIIFVGDSLNRNMWESLVCILRHGVRDKRRMYEASGRNQFKTRGYYSFRFRD
YNCSVDFIRSIFLVKEMINETKGGAVVDAKLRLDELDETTPAYRTADIVVFNTGHWWTHW
KTSRGLNYYQEGNYVHPSLEVMDAYKRALTTWARWVDKNIDSTRTQVVFRGYSLTHFRGG
QWNSGGRCHRETEPIFNRTHLAEYPEKMRILEQVLGRMRTPVIYLNISAMTDYRKDAHPS
VYRVRYETEEERMAAVAKQDCSHWCLPGVPDSWNELLYASLLQAGRGSWRL
>Os06t0207500.02
SVPVDPAASTKHSGSGGGGGAASNNGGGGSAPPPGNLAGSGTPPAKGSGGDGGGAPANNS
TSGGAPANSAVEQSSPAGDGGGSPSTASSSAGKSSSANTGEESVDKSNKQSGSGGEAPSN
GDAVSDKKNSTAKADTEVAVKASSDNSTGTGSSAKGESNVGSNSSAGSGNGVASSVSSAA
VNSTAVKTDAKDVVVATSTDSAGSVSDVKADLSNRSDTPPASGSGHSNHTSDVTVSPAKG
NAKDGGADTNKASGNVASTSNQTASTAMVAKKAGGSPSKNQTSVASTNSKNQNQTSAGVA
SGGSSGTTSKQEETTSQGSVGSSKDHPAQAINSKTSNYSEVLVKGNGSSTKQASQKQPDK
KVDWIKEMASCDMFHGNWVRDESYPLYPEGSCPHIDEPFDCYLNGRPDRAYQKLRWQPSS
CNIPRLNPTDMLERLRGKRLVFVGDSLNRNMWESLVCILRNSVKDKRKVFEASGRHEFKT
EGSYSFLFTDYNCSVEFFRSPFLVQEWEMKVSNGKKKETLRLDIVEQSSPKYKDADFLIF
NTGHWWTHEKTSLGKDYYQEGNHVYSELNVVDAFHKALVTWSRWIDANVNPKKTTVLFRG
YSASHFSGGQWNSGGSCDKETEPIRNEQYLSTYPPKMSILEDVIHKMKTPVVYLNITRMT
DYRKDAHPSIYRKRNLTEDERRSPERYQDCSHWCLPGVPDSWNELLYAQLLIKQHQMLQQ
>Zm00001eb426260
MAGWRKAWMSVLDRAGGGGSTVSLQGRLHLPSILASYKRGGNKYGNGHVSGKAVAACFSV
AVALAFFYASVTGGPAAAGFSSSSYALLLPWLSSNSSSTSPKKSPPTHPPPVSPAVAAGG
AADHPTDARNATAVSRRVPSGGAVGGSSGSEVGLGRASSAPRRTGSAQGRLPLQDAGNAT
VGSDAKPTSNSNRTREDGPQVETAMRMQQWQKADGASRASHDAAVVVGDGGQRAANTTDI
ATGNSTYTGTSSREETDKDSAVGYVQNLPRRVALPSRPERKAERHRRRRAVRHRHPRRRK
ETLVSAQDLAAERSDDEMAGVKTSLAVGPGNDMAAGANASMGAVGAGNNRVVWTSGVQDL
VSFAKCDVFSGRWVRDESYGFYPPKSCKLIDDDFNCHKNGRSDSDFLRWRWQPHGCDIPR
LNATEFLERLRGQRIIFVGDSLNRNMWESLVCILRHGVRDRRSVYEASGKNQFKTRGYYS
FVFRDYNCSVDFIRSIFLVRETIREGRNGTEDAKLKLDELDATTPAYQTADIVVFNTGHW
WTHYKTSRGLNYYQEGNHVYPSLDVLDAYRRALVTWARWVDKNIDPRRTQVVFRGYSLSH
FRGGQWNSGGRCHGETEPIFNQTYLTEYPEKMVVLEQVLRQMKTPVIYLNISTLTDYRKD
GHPSVYRIRCDTEEERMAMVKKQDCSHWCLPGVPDTWNELLYASLLQAGKGSWKL
>Zm00001eb256510
MKGAWRQSGVAAVAEHLGHLGGAGLVGRALPVRLCLYGLTLTFAGFAVFLCFAPSLIVPP
ASSPGVAWFDDGLIASASPYRAQVSGFLSSLFPAISSSTVPPGGVAVSCSRGNGSSAVRR
GEQLGSGGGAPVSSKEAPVPGDATATVLSGAAPVDHVQGGAKAKHSAWSAAAESKGGPGP
GLASGGSAQNVTSAKGGVPVGINGSDDTNASSVDAGDGNGVRPSARYTAGSTHQLGSGTA
ALVNGATASFLNQTASEVAAAMDGNGSAAAVNNQTVPIQAPADSKSHSSAASDGSNSTAA
NKQNESTASPQGSTSPVKDRSARGATPTASDNGDVPVEADANAGWRMKADWIENMARCDM
FYGNWVRDDSYPLYPAGSCPHVDESFNCHLNGRPDKAYERLRWQPSGCRIPRLNPTDMLE
RLRGKRLVFVGDSLNRNMWESLICILRNSVKDKSKVFEVSGRSQFRAEGSYSFLFQDYNC
SVEFFRSPFLVQEWEMPISNGKGTRETLRLDVIDPAFPRYKNADIIIFNTGHWWTHDKTS
LGKDYYQEGNRVYSELDVHDAFRRALNTWAKWVDSSVNPKKTTVFFRGYSASHFSGGQWN
SGGSCDKETDPITDGQYLTPYPEKMSILEEVLREMKTPVVYLNITRMTDYRKEAHPSAYR
KQELTEEERQSPELYQDCSHWCLPGVPDSWNELLYAQILLKQQHAMAMQQ
>Zm00001eb193280
MKGAWKQSGVVAVADQLGYLGGAGFVGRARPVTLCLYGLALTFAGFAVFLCFAPSLPVPP
ASSPGAAWFDGLIASASPYRAQVSGFLSSLFPANSSSTVPPGGGVAARRAGPSGGGFAAS
GSRGNGSTSSAVRPGEQLGSGGGVPPSRVGNGEPPSGKEAPVPGDATAAVPSGAPPDDHV
QGEGGAGAKHSVGSAAAEAKGGSGPGPGRPSGGSAQNGTSAKGRVPILINGSYANANSAD
AGDGNGMRASARNAAGSTHQLRSGTAALGNTVAVSSLNQTASAVAVAAREGNGTATAGNN
QTFLIQAPADNKNHSSVASDGSNSSPTNKQNESPASPQGSTSTVKDQSARGPTPAAIVPV
KADANAGRRMKADWTENMAGCDLFYGNWVRDDSYPLYPAGSCPHIDESFNCHLNGRPDKA
YERLRWQPSGCRIPRLNPTDMLERLRGKRLVFVGDSLNRNMWESLICILRNSVKDKSKVF
EVSGRSQFRAEGSYSFLFQDYNCSVEFFRSPFLVQEWEMPVSNGKGTRETLRLDIIDPSF
PRYKNADIVIFNTGHWWTHDKTSLGKDYYQEGNRVYSELDVHDAFRRALNTWAKWVDSNV
NPKKTTVFFRGYSASHFSGGQWNSGGSCDRETEPITDDQYLTPYPTKMSILEEVLRGMKT
PVVYLNITRMTDYRKEAHPSVYRKQKLTEEERKSPELYQDCSHWCLPGVPDSWNELLYAQ
ILLTQQHGMQQ
>Zm00001eb115000
MAAMDLLSGKLIRSLRLHSSLLPSAPSSSRAVPTSRRLRRRRHAPLYCRLTTTSSSSSAS
TTTTTGVEEDVKSQDLSSLLTSSDPSAAPAVGTKKKRSGGSSGASSIPSGVRLEGISKSY
KGVTVLKDVSWEVQRGEKVGLVGVNGAGKTTQLRIIAGLEKPDGGAVIKAKENMKIAFLS
QEFEVSASRTVREEFFSAFEEEMEVKRRLEQVQAALEGATEDMDLMGRLLDELDLLQRRS
QDVDLDMVDVKVQKLMPELGFMPEDADRLVASFSGGWKMRMSLGKILLQDPDLLLLDEPT
NHVDLDTIEWLEMYLKTQDVPMVIISHDRAFLDQLCTKIVETEFGVSKTYKGNYSEYILA
KAVAVEAQYAAWEKQQKEIEQTKELINRLGAGVNAGRASSEQKKLEKLEKEGLIEKPFQR
KQLKIRFPERGRSGRTVLTINNLQFGFENKTLFNNANLIVERGEKIAIIGPNGCGKSTLL
KLMLGMEKPQGGEVLLGEHNVLPNYFEQNQAEALDLEKTVLDTVAEAAEDWILDDIKGLL
GRCNFRDDMLDRKVQFLSGGEKARLAFCKFMVTPSTLLILDEPTNHLDIPSKEMLEEAIS
EYTGTVITVSHDRYFIKQIVNRVIEVKDQTIQDYQGDYNYYLERNLEARERELAREEELE
ERAPKVKAKSKMSKAEKAVRKKQKMQAFQQSKQKSKSLKNSKRWN
>Zm00001eb259290
MAAAAAASMVVVREVLGLDVVDEVDQPIIDYIANVLADEDFDFGAPEGHGIFEALGELLI
DSGCVSDQEHCLQVCSKLCEKFGKHGLVKPKQAMRSLVTPLRMNAGMDDDVAPKKPQPEV
FDGPLLSSRDKAKIERRKRKEERQREVQYQMHVAEMETLRAGMPPVYVNHSNDGGPAVRD
IHMENFSVTVGGRDLIQEATITLAFGRHYGLVGRNGTGKTSFLRAMALHAIDGIPKNCQI
LHVEQEVVGDDTTALQCVLNADVERVQLLQEEARLVQQQKDLEIEAEFGQSSDKGKDGFD
KDSISKRLEEIYKRLELIDADAAEARAASILAGLSFTPEMQRKRTKQFSGGWRMRIALAR
ALFIEPDLLLLDEPTNHLDLHAVLWLETYLLKWPKTFIVVSHAREFLNTVVTDILHLHGR
KLHAYKGDYDTFERTREEHLKNQQKAFETNEKARQHMQTFIDKFRYNAKRASLVQSRIKA
LERMEHVDAVVSDPDYKFEFPTPDDRPGPPIISFSDASFGYPGGPTLFKNLNFGIDLDSR
IAMVGPNGIGKSTILKLISGDLQPTSGTVFRSPKVRMAVFNQHHVDGLDLTVNPLLYMMK
CYPGVPEQKLRAHLGSFGVSGSLALQSMYTLSGGQKSRVAFAKITFKKPHIILLDEPSNH
LDLDAVEALIQGLLIFQGGVLMVSHDEHLITGSVDELWVVSEGRVTPFSGTFKDYKKMLK
>Zm00001eb116920
MGRKDTSSSSAATGGGKKEKPMSVSAMLASMDAPAAKAKSSKAKAKAKPSKAPASSYMGD
IDLPPSDDEDEEEARLAAAAKPKPARAAVVDLSAGAAPSHKDAKKKDKREAVAAAAAEAA
RQEALRDDRDAFSVVIGARVPGSSADDGAVDDNVRDVVLENFSVSARGKELLKGASLRIS
HGRRYGLVGPNGMGKSTLLKLLAWRQVPVPRNIDVLLVEQEIIGDDRSALEAVVAADEEL
TALRAEQARLEVSNDADDNERLLEVYEKLNLRDSDAARARASKILAGLGFDQAMQARSTK
SFSGGWRMRISLARALFMQPTLLLLDEPTNHLDLRAVLWLEEYLCSQWKKTLIVVSHDRD
FLNTVCNEIIHLHDKSLHVYRGNFDDFESGYEQKRKEMNRKFEVYEKQMKAARKSGSKAA
QDKVKGQALSKAAKEAAKNKGKGKSAADDDDDQKHVAVPQKWRDYSVEFHFPEPTELTPP
LLQLIEVGFSYPGRPDFKLSGVDVGIDMGTRVAIVGPNGAGKSTILNLLAGDLTPTEGEV
RRSQKLRIGRYSQHFVDLLTMEENAVQYLLRLHPDQEGMSKAEAVRAKLGKFGLPGHNHL
TPIVKLSGGQKARVVFTSISMSQPHILLLDEPTNHLDMQSIDALADALDEFTGGVVLVSH
DSRLISRVCDDEQRSEIWVVEDGSVDKYDGTFEDYKDELMEEIKKEVEE
>Zm00001eb301430
MGRKDTSSSSAAAGGGKKEKPMSVSAMLASMDAPAAKPKSSKSAAPSKAKAKPSKAPASS
YMGDIDLPPSDDEDQEEAQLAAAKPKPARAAVDLSAGAAPSHKDAKKKDKREAVAAAAAE
AARQEALRDDRDAFSVVIGARVPGSSAADGTVDDNVRDVVLENFSVSARGKELLKSASLR
ISHGRRYGLVGPNGMGKSTLLKLLAWRQVPVPRNIDVLLVEQEIIGDDRSALEAVVAADE
ELTALQAEQARLEASNDADDNERLVEVYEKLNLVGSDVARARASKILAGLGFDQAMQARS
TKSFSGGWRMRISLARALFMQPTLLLLDEPTNHLDLRAVLWLEEYLCSQWKKTLIVVSHD
RDFLNTVCNEIIHLHDKSLHVYRGNFNDFESGYEQKRKEMNRKFEVYEKQMKAARKSGSK
AAQDKVKGQALSKAAKEAAKNKGKGKSAADDDDDQKQVAVPRKWRDYSVEFHFPEPTELT
PPLLQLIEVGFSYPGRPDFKLSGVDVGIDMGTRVAIVGPNGAGKSTLLNLLAGDLIPTEG
EARRSQKLRIGRYSQHFVDLLTMEENAVQYLLRLHPDQEGMSKAEAVRAKLGKFGLPGHN
HLTPIVKLSGGQKARVVFTSISMSQPHILLLDEPTNHLDMQSIDALADALDEFTGGVVLV
SHDSRLISRVCEDEQRSEIWVVEDGTVNRYDGTFEDYKDELMEEIKKEVEE
