# Supplementary material for: Genome-Wide Identification and Analysis of the ABCF Gene Family in Triticum aestivum
Source: Int J Mol Sci. 2023 Nov 18;24(22):16478. doi: 10.3390/ijms242216478 (PMC10671407; doi:10.3390/ijms242216478)
Supplement: Supplementary file 1 [file ijms-24-16478-s001.zip › Table S2.xlsx]

## Sheet: Sheet1
Table S2. Specific primers used for this article.
ABC1-QRT-F	CTATAACGCCGAAAACGCCA
ABC1-QRT-R	GAGTTCGGCGGTACATTGTC
ABC2-QRT-F	GGGAGAAGCGGTAGAACTGT
ABC2-QRT-R	CTCGAAGTAGTTGGGCAGGA
ABC3-QRT-F	ACAGGAAATCTTGCCCTCCA
ABC3-QRT-R	TGATCAGATGCTCGTCGTGA
ABC4-QRT-F	TGATGACTTTGAGAGCGGGT
ABC4-QRT-R	GCAAAGTGGGTTCTGGGAAG
BSMV-TaABC2-F1	CATTTTTTTTTTTTTTTAGCTAGCAAACCAGAGGGAGGGCATAGA
BSMV-TaABC2-R1	GATGATTCTTCTTCCGTTGCTAGCGTGGATTCATCGGAGAGGA
BSMV-TaABC2-F2	CATTTTTTTTTTTTTTTAGCTAGCGAACTGAGATGCTGCCCCTAT
BSMV-TaABC2-R2	GATGATTCTTCTTCCGTTGCTAGCTCGTTGCAAATAAAGCATTCCTC
CDC-F	CAAATACGCCATCAGGGAGAACATC
CDC-R	CGCTGCCGAAACCACGAGAC
BSMV-F	CGAGCGAAAAGAGCCACAAC
BSMV-R	CTTCCTCGGCATCTGGAATGA
CWMV-F	ACGAGGACGAGTGTGTTGTC
CWMV-R	CACCTTTAGCAGCACCGAGA
WYMV-F	ATGATGCCGACGCTGCGCGTC
WYMV-R	CTGGAGTTGTTGTGTTCGATT
